# 1 The influence of task outcome on implicit motor learning

2

3 Hyosub E. Kim<sup>1,2,3\*</sup>, Darius E. Parvin<sup>1,2</sup>, Richard B. Ivry<sup>1,2</sup>

4

5 <sup>1</sup>Department of Psychology and <sup>2</sup>Helen Wills Neuroscience Institute, University of California, Berkeley

6 <sup>3</sup>Department of Physical Therapy, University of Delaware

7

8

## 9 **ABSTRACT**

10 Recent studies have demonstrated that task success signals can modulate learning during  
11 sensorimotor adaptation tasks, primarily through engaging explicit processes. Here we examine the  
12 influence of task outcome on implicit adaptation, using a reaching task in which adaptation is induced  
13 by feedback that is not contingent on actual performance. We imposed an invariant perturbation  
14 (rotation) on the feedback cursor while varying the target size. In this way, the cursor either hit or  
15 missed the target, with the former producing a marked attenuation of implicit motor learning. We  
16 explored different computational architectures that might account for how task outcome information  
17 interacts with implicit adaptation. The results fail to support an architecture in which adaptation operates  
18 in parallel with a model-free operant reinforcement process. Rather, task outcome may serve as a gain  
19 on implicit adaptation or provide a distinct error signal for a second model-based process, in addition to  
20 implicit adaptation.

## 21 INTRODUCTION

22 Multiple learning processes contribute to successful goal-directed actions in the face of changing  
23 physiological states, body structures, and environments (Taylor et al., 2014; Huberdeau et al., 2015;  
24 McDougale et al., 2016). Among these processes, implicit sensorimotor adaptation is of primary  
25 importance for maintaining appropriate calibration of sensorimotor maps over both short and long  
26 timescales. A large body of work has focused on how sensory prediction error (SPE), the difference  
27 between predicted and actual sensory feedback, drives sensorimotor adaptation (Shadmehr et al.,  
28 2010). In addition, there is growing appreciation of the contribution of other processes to sensorimotor  
29 learning, including strategic aiming and reward-based learning (Taylor et al., 2014; Wu et al., 2014;  
30 Bond and Taylor, 2015; Galea et al., 2015; Nikooyan and Ahmed, 2015; Summerside et al., 2018). In  
31 terms of the latter, several recent studies have shown that rewarding successful actions alone is  
32 sufficient to learn a new sensorimotor mapping (Izawa and Shadmehr, 2011; Therrien et al., 2016,  
33 2018).

34

35 Little is known about how feedback about task outcome impacts adaptation from SPE; indeed, the  
36 literature presents an inconsistent picture of how reward impacts performance in sensorimotor  
37 adaptation tasks. For example, two recent visuomotor rotation studies using similar tasks and reward  
38 structures led to divergent conclusions: One reported that reward enhanced retention of the adapted  
39 state, but had no effect on the rate of adaptation (Galea et al., 2015), whereas the other reported a  
40 beneficial effect of rewards specifically on adaptation rate (Nikooyan and Ahmed, 2015). More recently,  
41 Leow and colleagues (Leow et al., 2018) created a situation in which task outcome was experimentally  
42 manipulated by shifting the target on-line to either intersect a rotated cursor or move away from the  
43 cursor. Task success, artificially imposed by allowing the displaced cursor to intersect the target, led to  
44 attenuated adaptation.

45

46 One factor that may contribute to these inconsistencies is highlighted by studies showing that, even in  
47 relatively simple sensorimotor adaptation tasks, overall behavior reflects a combination of explicit and  
48 implicit processes (Taylor and Ivry, 2011; Taylor et al., 2014). That is, while SPE is thought to drive  
49 adaptation (Tseng et al., 2007), participants are often consciously aware of the perturbation and  
50 strategically aim as one means to counteract the perturbation. It may be that reward promotes the  
51 activation of such explicit processes (Bond and Taylor, 2015). Consistent with this hypothesis, Codol  
52 and colleagues (Codol et al., 2017), showed that at least one of the putative effects of reward, the  
53 strengthening of motor memories (Shmuelof et al., 2012), is primarily the result of re-instantiating an  
54 explicit aiming strategy rather than via the direct modulation of adaptation. As explicit processes are  
55 more flexible than implicit processes (Bond and Taylor, 2015), differential demands on strategies may  
56 contribute toward the inconsistent effects reported across previous studies manipulating reward  
57 (Holland et al., 2018).

58

59 We recently introduced a new method, referred to as clamped visual feedback, designed to isolate  
60 learning from implicit adaptation (Morehead, Taylor, Parvin, & Ivry, 2017; Kim, Morehead, Parvin,  
61 Moazzezi, & Ivry, 2018). During the clamp, the angular trajectory of the feedback cursor is invariant with  
62 respect to the target location and thus spatially independent of hand position (Shmuelof et al., 2012;  
63 Vaswani et al., 2015; Morehead et al., 2017; Kim et al., 2018; Vandevoorde and Orban de Xivry, 2018).  
64 Participants are informed of the invariant nature of the visual feedback and instructed to ignore it. In this  
65 way, explicit aiming should be eliminated and, thus, allow for a clean probe of implicit learning  
66 (Morehead et al., 2017).

67

68 Here, we employ the clamp method to revisit how task outcome, even when divorced from actual  
69 performance, influences implicit adaptation. In a series of three experiments, the clamp angle was held  
70 constant and only the target size was manipulated. We assume that the clamp angle, defined with  
71 respect to the centers of the target and feedback cursor, specifies the SPE. In contrast, by varying the

72 target size, we independently manipulate the information regarding task outcome, comparing conditions  
73 in which the feedback cursor signals the presence or absence of a target error (TE), defined by whether  
74 the cursor misses or hits the target. Given that the participants have no control over the feedback  
75 cursor, the effect of this task outcome information would presumably operate in an implicit, automatic  
76 manner, similar to how we assume the clamped feedback provides an invariant SPE signal.

77  
78 Our experiments show that hitting the target has a strong effect on performance, attenuating the rate  
79 and magnitude of learning. Through computational modeling, we explore a series of hypotheses that  
80 might account for this effect. In particular, we consider models in which implicit learning is driven by  
81 both SPE and TE, or where hitting the target serves as an intrinsic reward signal, one that can reinforce  
82 associated movements or modulate adaptation.

83

## 84 **RESULTS**

85 In all experiments we used clamped visual feedback, in which the angular trajectory of a feedback  
86 cursor is invariant with respect to the target location and thus spatially independent of hand position  
87 (Morehead et al., 2017). The instructions (see Supplement) emphasized that the participant's behavior  
88 would not influence the cursor trajectory: They were to ignore this stimulus and always aim directly for  
89 the target. This method allows us to isolate implicit learning from an invariant error, eliminating potential  
90 contributions from explicit aiming that might be used to reduce task performance error.

91

92 In Experiment 1, we asked if the task outcome, defined in terms of whether or not the cursor hit the  
93 target, would modulate learning under conditions in which the feedback is not contingent on behavior.  
94 We tested three groups of participants ( $n=16/\text{group}$ ) with a  $3.5^\circ$  clamp for 80 cycles (8 targets per  
95 cycle). The purpose of this experiment was to examine the effects of three different relationships  
96 between the clamp and target while holding the visual error (defined as the center-to-center distance  
97 between the cursor and target) constant (Fig. 1b): Hit Target (when the terminal position of the clamped

98 cursor is fully embedded within a 16 mm diameter target), Straddle Target (when roughly half of the  
99 cursor falls within a 9.8 mm target, with the remaining part outside the target), Miss Target (when the  
100 cursor is fully outside a 6 mm target).

101

102 Hitting the target reduced the overall change in behavior (Fig. 1d). Statistically, there was a marginal  
103 difference on the rate of initial adaptation (one-way ANOVA:  $F(2,45)=2.67$ ,  $p=.08$ ,  $\eta^2=.11$ ; permutation  
104 test:  $p=.08$ ; Fig. 1e) and a significant effect on late learning ( $F(2,45)=4.44$ ,  $p=.016$ ,  $\eta^2=.17$ ; Fig. 1f). For  
105 the latter measure, the value for the Hit Target group was approximately 35% lower than for the  
106 Straddle and Miss Target groups, with post-hoc comparisons confirming the substantial differences in  
107 late learning between the Hit Target and both the Straddle Target (95% CI  $[-16.13^\circ, -2.34^\circ]$ ,  $t(30)=-2.73$ ,  
108  $p=.010$ ,  $d=.97$ ) and Miss Target (95% CI  $[-16.76^\circ, -2.79^\circ]$ ,  $t(30)=-2.86$ ,  $p=.008$ ,  $d=1.01$ ) groups. These  
109 differences were also evident in the aftereffect measure, taken from the first cycle of the no feedback  
110 block (see Methods). The learning functions for the Straddle and Miss Target groups were remarkably  
111 similar throughout the entire clamp block and reached similar magnitudes of late learning (95% CI  $[-$   
112  $7.90^\circ, 8.97^\circ]$ ,  $t(30)=.13$ ,  $p=.898$ ,  $d=.05$ ).

113

114 As seen in Fig. 1d, the change in hand angle from the final cycle of the clamp block to the final cycle of  
115 the no feedback block was less for the Hit than the Straddle and Miss groups (one-way ANOVA:  
116  $F(2,45)=4.42$ ,  $p=.018$ ,  $\eta^2=.16$ ; Hit vs Miss: 95% CI  $[1.47^\circ, 8.00^\circ]$ ,  $t(30)=2.96$ ,  $p=.006$ ,  $d=1.05$ ; Hit vs  
117 Straddle: 95% CI  $[1.06^\circ, 8.74^\circ]$ ,  $t(30)=2.61$ ,  $p=.014$ ,  $d=.92$ ). This result indicates that retention was  
118 strongest in the Hit group. However, retention is generally analyzed as a relative, rather than absolute  
119 measure, especially when the amount of learning differs between groups. We thus re-analyzed the  
120 change in hand angle across the no feedback block, but now as the ratio of the last no-feedback cycle  
121 relative to the last clamp cycle. In this analysis, there was no difference between the three groups (Fig.  
122 1g;  $F(2,45)=2.06$ ,  $p=.139$ ,  $\eta^2=.08$ ; permutation test:  $p=.138$ ).

123

124 Interestingly, the results from this experiment are qualitatively different to those observed when  
125 manipulating the angular deviation of the clamp. Our previous study using clamped visual feedback  
126 demonstrated that adaptation in response to errors of varying size, which was assessed by  
127 manipulating the clamp angle, results in different early learning rates, but produces the same  
128 magnitude of late learning (Kim et al., 2018). In contrast, the results in Experiment 1 show that the  
129 hitting the target attenuates learning, with the effect becoming pronounced after prolonged exposure to  
130 the perturbation. Furthermore, the effect of task outcome appears to be categorical, as it was only  
131 observed for the condition in which the cursor was fully embedded within the target (Hit Target), and not  
132 when the terminal position of the cursor fell partially outside the target (Straddle Target).

133

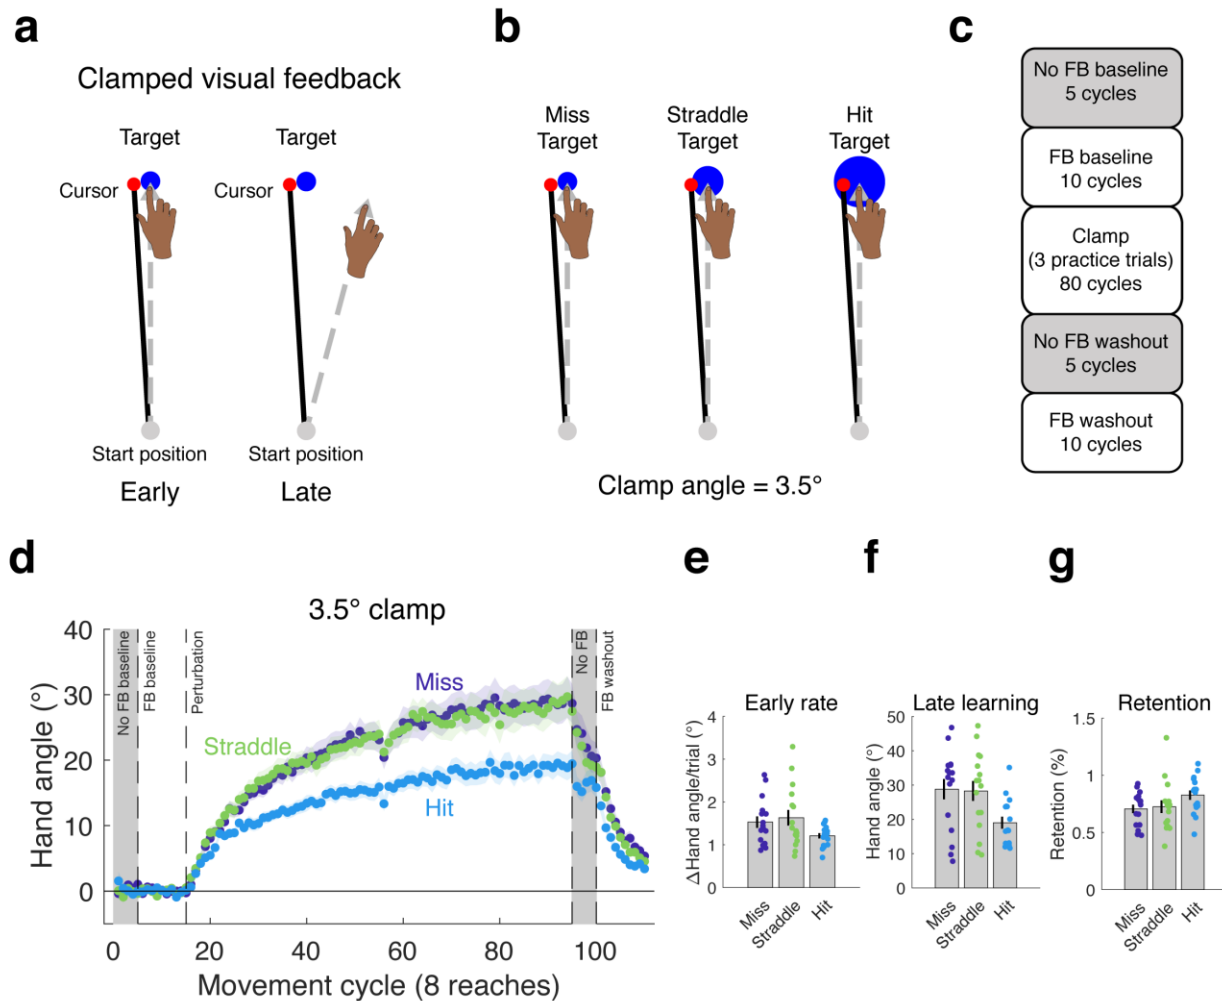

134

135 **Figure 1 Hitting the target attenuates the behavioral change from clamped feedback.** (a) During  
 136 clamped visual feedback, the angular deviation of the cursor feedback is held constant throughout the  
 137 perturbation block, and participants are fully informed of the manipulation. (b) The clamp angle was  
 138 equal across all three conditions tested in Experiment 1, with only the target size varying between  
 139 conditions. (c) Block design for experiment. (d) As in previous studies with clamped feedback, the  
 140 manipulation elicits robust changes in hand angle. However, the effect was attenuated in the Hit Target  
 141 condition, observed in the (e) rate of early adaptation, and, more dramatically, in (f) late learning. (g)  
 142 The percentage of learning retained over the no feedback block following the clamp did not differ  
 143 between groups. Dots represent individuals; shading and error bars denote SEM.

144

145 **Source data 1** This file contains hand angle data for each trial and participant in Experiment 1, and  
 146 was used to generate Figure 1d-g. Reaction times (RTs) and movement times (MTs) are also included.  
 147 Note that hand angles were flipped for participants who experienced a counter-clockwise clamp.

148

149

150 *Experiment 2*

151 Experiment 2 was designed to extend the results of Experiment 1 in two ways: First, to verify that the  
152 effect of hitting a target generalized to other contexts, we changed the size of the clamp angle. We  
153 tested two groups of participants ( $n=16/\text{group}$ ) with a small  $1.75^\circ$  clamp. For the Hit Target group (Fig.  
154 2a), we used the large 16 mm target, and thus, the cursor was fully embedded. For the Straddle Target  
155 group, we used the small 6 mm diameter target, resulting in an endpoint configuration in which the  
156 cursor was approximately half within the target and half outside the target. We did not test a Miss  
157 Target condition because having the clamped cursor land fully outside the target would have  
158 necessitated an impractically small target ( $\sim 1.4$  mm). Moreover, the results of Experiment 1 indicate  
159 that this condition is functionally equivalent to the Straddle Target group. The second methodological  
160 change was made to better assess asymptotic learning. We increased the number of clamped reaches  
161 to each location to 220 (reducing the number of target locations to four to keep the experiment within a  
162 1.5-hour session). This resulted in a nearly three-fold increase in the number of clamped reaches per  
163 location.

164

165 Consistent with the results of Experiment 1, the Hit Target group showed an attenuated learning  
166 function compared to the Straddle Target group (Fig. 2b). Statistically, there was again only a marginal  
167 difference in the rate of early adaptation (95% CI  $[-.52^\circ/\text{cycle}, .01^\circ/\text{cycle}]$ ,  $t(30)=-1.96$ ,  $p=.06$ ,  $d=.69$ ; Fig.  
168 2c), whereas the difference in late learning was more pronounced (95% CI  $[-11.38^\circ, -1.25^\circ]$ ,  $t(30)=-$   
169  $2.54$ ,  $p=.016$ ,  $d=.90$ ; permutation test:  $p=.007$ ; Fig. 2d). Indeed, the 35% attenuation in asymptote for  
170 the Hit Target group compared to the Straddle Target group is approximately equal to that observed in  
171 Experiment 1.

172

173 We used a different approach to examine retention in Experiment 2, having participants complete 10  
174 cycles with a  $0^\circ$  clamp following the extended  $1.75^\circ$  clamp block (Shmuelof et al., 2012). We opted to



175 use this alternative method since the presence of the  $0^\circ$  clamp would create less contextual change  
176 when switching from the clamp to the retention block, compared to the no feedback block of Experiment  
177 1. In terms of absolute change across the  $0^\circ$  clamp block, there was a trend for greater retention in the  
178 Hit group compared to the Straddle group (95% CI [-.27°, 3.53°],  $t(30)=1.75$ ,  $p=.090$ ,  $d=.62$ ). However,  
179 when analyzed as a proportional change, the difference was not reliable (95% CI [-.06, .27],  $t(30)=1.27$ ,  
180  $p=.21$ ,  $d=.45$ ).

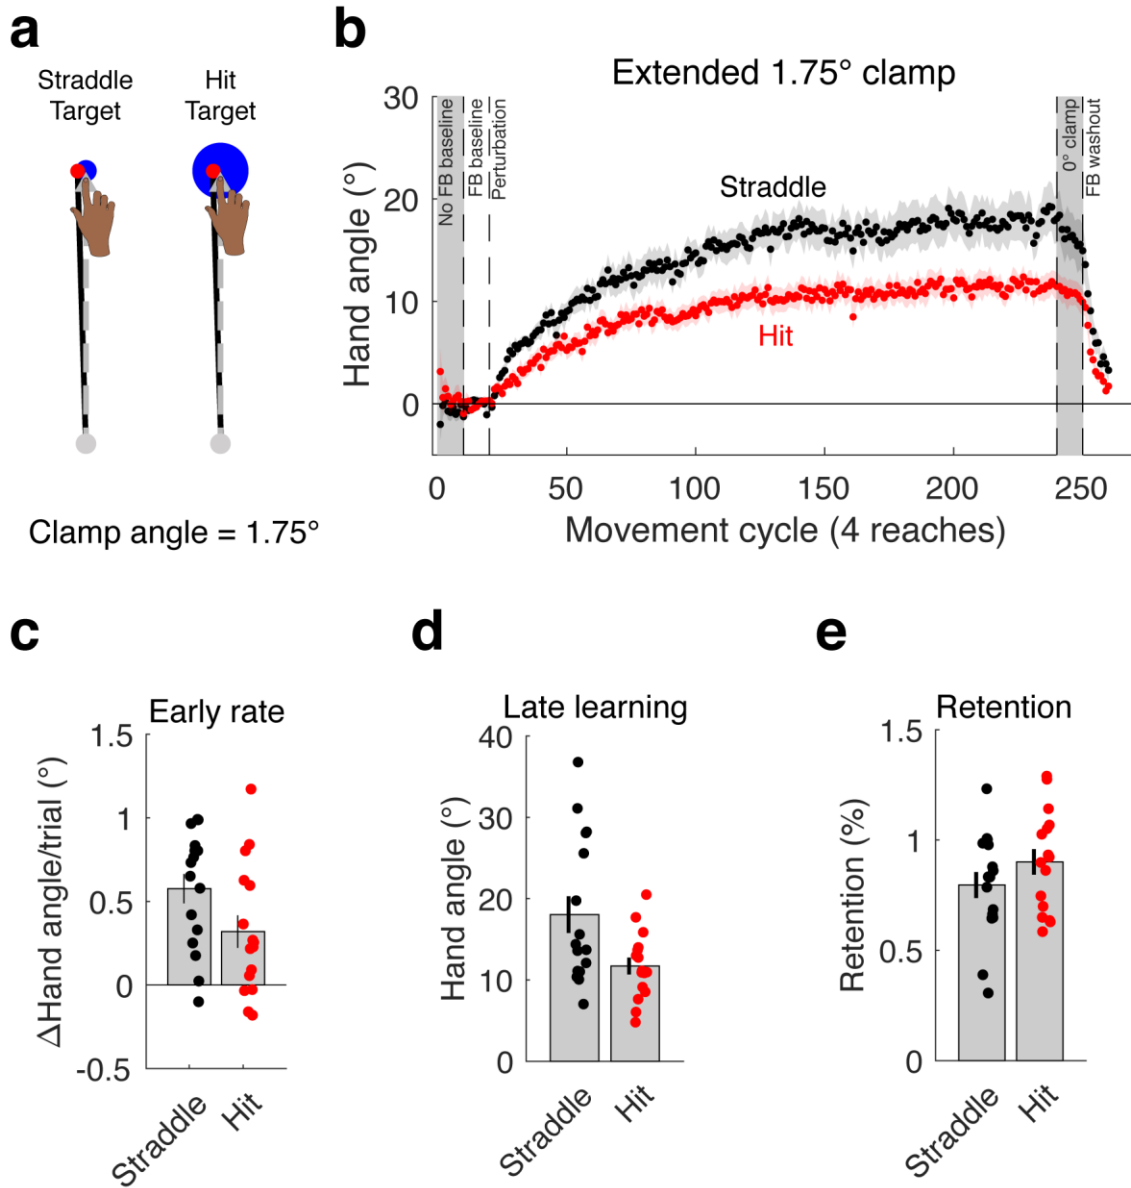

181

182

183 **Figure 2** The attenuation of adaptation caused by hitting the target **(a)** generalizes to a different clamp  
184 angle and is stable over an extended clamp block **(b)**. As in Experiment 1, there was **(c)** a marginal  
185 difference in early adaptation rate that became **(d)** a more dramatic difference in late learning. **(e)**  
186 Again, there was no difference in the percentage of retention, this time during a 0° clamp block. Dots  
187 represent individuals; shading and error bars denote SEM.

188  
189 **Source data 2** This file contains hand angle data for each trial and participant in Experiment 2, and  
190 was used to generate Figure 2b-e. Reaction times (RTs) and movement times (MTs) are also included.  
191 Note that hand angles were flipped for participants who experienced a counter-clockwise clamp.  
192

193

194 The results of these first two experiments converge in showing that learning from an invariant error is  
195 attenuated when the cursor hits the target, relative to conditions in which at least part of the cursor falls  
196 outside the target. This effect replicated across two experiments that used different clamp sizes.

197

198 *Attenuated behavioral changes are not due to differences in motor planning*

199 Although we hypothesized that manipulating target size in Experiments 1 and 2 would influence  
200 learning mechanisms that respond to the differential task outcomes (i.e., hit or miss), it is also important  
201 to consider alternative explanations for the effect of target size on learning. Figure 3 provides a  
202 schematic of the core components of sensorimotor adaptation. The figure highlights that changes in  
203 adaptation might arise because target size alters the inputs on which learning operates, rather than  
204 from a change in the operation of the learning process itself. For example, increasing the target size  
205 may increase perceptual uncertainty, creating a weaker error signal. We test this hypothesis in a control  
206 condition in Experiment 3.

207

208 Another hypothesis centers on how variation in target size might alter motor planning. Assuming target  
209 size influences response preparation, participants in the Hit Target groups had reduced accuracy  
210 demands relative to the other groups, given that they were reaching to a larger target (Soechting,  
211 1984). If the accuracy demands were reduced for these large targets, then the motor command could  
212 be more variable, resulting in more variable sensory predictions from a forward model, and thus a

213 weaker SPE (Körding and Wolpert, 2004). While we do not have direct measures of planning noise, a  
214 reasonable proxy can be obtained by examining movement variability during the unperturbed baseline  
215 trials (data from clamped trials would be problematic given the induced change in behavior). If there is  
216 substantially more noise in the plan for the larger target, then the variability of hand angles should be  
217 higher in this group (Churchland et al., 2006). In addition, one may expect faster movement times (or  
218 peak velocities) and/or reaction times for reaches to the larger target, assuming a speed-accuracy  
219 tradeoff (Fitts, 1992).

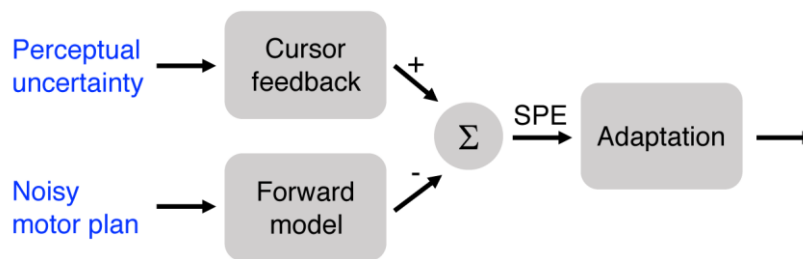

220

221 **Figure 3** Target size could affect adaptation due to increased perceptual uncertainty or greater  
222 variability in motor planning. In the case of perceptual uncertainty, the feedback signal is weakened,  
223 thus leading to a weaker SPE signal. In the case of noisy motor planning, the forward model prediction  
224 would also be more variable and effectively weaken the SPE.  
225

226 Examination of kinematic and temporal variables (see Supplement) did not support the noisy motor  
227 plan hypothesis. In Experiment 1, average movement variability across the eight targets during cycles  
228 2-10 of the veridical feedback baseline block were not reliably different between groups (variability:  
229  $F(2,45)=2.32$ ,  $p=.110$ ,  $\eta^2=.093$ ). Movement times across groups were not different ( $F(2,45)=2.19$ ,  
230  $p=.123$ ,  $\eta^2=.089$ ). However, we did observe a difference in baseline RTs ( $F(2,45)=4.48$ ,  $p=.017$ ,  
231  $\eta^2=.166$ ), with post hoc t-tests confirming that the large target (Hit) group had faster RTs than the small  
232 target (Miss) group (95%CI [-108ms, -16ms],  $t(30)=-2.74$ ,  $p=.010$ ,  $d=.97$ ) and medium target (Straddle)  
233 group (95%CI [-66ms, -10ms],  $t(30)=-2.76$ ,  $p=.010$ ,  $d=.97$ ). The medium target (Straddle) and small  
234 target groups' RTs were not reliably different (95% CI [-74ms, 26ms],  $t(30)=-.984$ ,  $p=.333$ ,  $d=.348$ ). This  
235 baseline difference in RTs was only observed in this experiment (see Supplement), and there was no

236 correlation between baseline RT and late learning for the large target group ( $r = .09$ ,  $p = .73$ ),  
237 suggesting that RTs are not associated with the magnitude of learning.

238

239 During baseline trials with veridical feedback in Experiment 2, mean spatial variability, measured in  
240 terms of hand angle, was actually lower for the group reaching to the larger target (Hit Target group:  
241  $3.09^\circ \pm .18^\circ$ ; Straddle Target group:  $3.56^\circ \pm .16^\circ$ ;  $t(30)=-1.99$   $p=.056$ ,  $d=0.70$ ). Further supporting the  
242 argument that planning was no different across conditions, neither reaction times (Hit Target:  $378 \pm 22$   
243 ms; Straddle Target:  $373 \pm 12$  ms) nor movement times (Hit Target:  $149 \pm 8$  ms; Straddle Target:  $157 \pm$   
244  $8$  ms) differed between the groups ( $t(30)=-0.183$ ,  $p=.856$ ,  $d=.06$  and  $t(30)=0.71$ ,  $p=.484$ ,  $d=.25$ ,  
245 respectively).

246

247 One reason for not observing consistent effects of target size on accuracy or temporal measures could  
248 be due to the constraints of the task. Studies showing an effect of target size on motor planning  
249 typically utilize point-to-point movements (Soechting, 1984; Knill et al., 2011) in which accuracy  
250 requires planning of both movement direction and extent. In our experiments, we utilized shooting  
251 movements, thus minimizing demands on the control of movement extent. Endpoint variability is  
252 generally larger for movement extent compared to movement direction (Gordon et al., 1994). It is also  
253 possible that participants are near ceiling-level performance in terms of hand angle variability.

254

255 *Theoretical analysis of the effect of task outcome on implicit learning.*

256 Having ruled out a motor planning account of the differences in performance in Experiments 1 and 2,  
257 we next considered different ways in which target error could affect the rate and asymptotic level of  
258 learning. Adaptation from SPE can be thought of as recalibrating an internal model that learns to predict  
259 the sensory outcome of a motor command (Figure 3). Here, we model adaptation with a single rate  
260 state-space equation of the of the following form:

261 
$$x(n+1) = A*x(n) + U(e) \quad \text{[Equation 1]}$$

262 where  $x$  represents the motor output on trial  $n$ ,  $A$  is a retention factor, and  $U$  represents the  
263 update/correction size (or, learning rate) as a function of the error (clamp) size,  $e$ . This model is  
264 mathematically equivalent to a standard single rate state-space model (Thoroughman and Shadmehr,  
265 2000), with the only modification being the replacement of the error sensitivity term,  $B$ , with a correction  
266 size function,  $U$  (Kim et al. 2018). Unlike standard adaptation studies where error size changes over the  
267 course of learning,  $e$  is a constant with clamped visual feedback and thus,  $U(e)$  can be estimated as a  
268 single parameter. We refer to this model as the motor correction variant of the standard state space  
269 model. The first two experiments make clear that a successful model must account for the differences  
270 between hitting and missing the target, even while holding the error term in Eqn. 1 (clamp angle)  
271 constant.

272

273 We consider three variants to the basic model that might account for how task outcome influences  
274 learning. The first model is motivated by previous studies that have considered how reinforcement  
275 processes might operate in sensorimotor adaptation tasks, and in particular, the idea that task outcome  
276 information impacts a model-free operant reinforcement process (Huang et al., 2011; Shmuelof et al.,  
277 2012). We can extend this idea to the clamp paradigm, considering how the manipulation of target size  
278 affects reward signals: When the clamp hits the target, the feedback generates a positive reinforcement  
279 signal; when the clamp misses (or straddles) the target, this reinforcement signal is absent. We refer to  
280 the positive outcome as an intrinsic reward given that it is not contingent on the participant's behavior.  
281 This signal could strengthen the representation of its associated movement (Castro et al., 2011;  
282 Shmuelof et al., 2012).

283

284 We combine this idea with the state space model to create a Movement Reinforcement model (Fig. 4a).  
285 Intuitively, this model accounts for the attenuated learning functions for the Hit conditions in  
286 Experiments 1 and 2 because the effect of movement reinforcement resists the directional change in

287 hand angle induced by SPEs. In this model, intrinsic reward has no direct effect on SPE-driven  
288 adaptation. That is, reward and error-based learning are assumed to operate independently of each  
289 other, with the final movement being a composite of these two processes.

290

291 To formalize the Movement Reinforcement model, the motor output,  $y$ , is a weighted sum of a model-  
292 free reinforcement process and an adaptation process,  $x$ :

$$293 \quad y(n) = (1-V_I(n))*x(n) + V_I(n)*V_d(n) \quad [\text{Equation 2}]$$

294 where a population vector (Georgopoulos et al., 1986),  $V$ , indicates the current bias of motor  
295 representations within the reinforcement system (see Methods). The direction of this vector ( $V_d$ )  
296 corresponds to the mean preferred direction resulting from the reinforcement history, with the length  
297 ( $V_I$ ) corresponding to the strength of this biasing signal. This vector can be viewed as a weight on the  
298 movement reinforcement process (0=no weight, 1=full weight), relative to the adaptation process.

299

300 In this framework, the vector is composed of directionally-tuned units, with the strength of each unit  
301 reflective of its reward history. The vector representing the weights on every unit,  $\mathbf{r}$ , is updated on each  
302 trial based on the task outcome:

$$303 \quad \mathbf{r}_\theta(n+1) = A' * \mathbf{r}_\theta(n) + s \quad [\text{Equation 3}]$$

$$304 \quad \mathbf{r}_{-\theta}(n+1) = A' * \mathbf{r}_{-\theta}(n) \quad [\text{Equation 4}]$$

305 where  $\theta$  indexes the unit corresponding to the direction of the movement,  $y(n)$ , on hit trials, and  $-\theta$   
306 indexes all of the other units on hit trials and all units on miss trials. In this simplified reward scheme,  
307 the weight to the unit corresponding to the rewarded movement direction is increased by magnitude  $s$   
308 on a trial-by-trial basis, and all weights are decremented due to a retention factor,  $A'$ , on every trial. The  
309 latter ensures that these reward-dependent weights revert back to zero in the absence of reward.

310

311 In sum, the Movement Reinforcement model entails four parameters, composed of separate update  
312 and retention parameters for the reinforcement learning process and the adaptation process. The  
313 former is model-free, dependent on an operant conditioning process by which a task outcome signal  
314 modifies movement biases, whereas the latter is model-based, using SPE to recalibrate an internal  
315 model of the sensorimotor map.

316

317 The second model entails a single process whereby the task outcome directly modulates the adaptation  
318 process. For example, an intrinsic reward signal associated with hitting the target could modulate  
319 adaptation, attenuating the trial-to-trial change induced by the SPE (Fig. 4b). In this Adaptation  
320 Modulation model, the reward signal can be interpreted as a gain controller, similar to previous efforts  
321 to model the effect of explicit rewards and punishments on adaptation (Galea et al., 2015). In  
322 Experiments 1 and 2, hitting the target presumably reduces the gain on adaptation, thus leading to  
323 attenuated learning.

324

325 We formalize the Adaptation Modulation model as follows:

326 
$$x(n+1) = \gamma_A * A * x(n) + \gamma_u * U(e) \quad [\text{Equation 5}]$$

327 where  $\gamma_A$  and  $\gamma_u$  are gains on the retention and update parameters, respectively. In the current  
328 implementation, we set  $\gamma_A$  and  $\gamma_u$  to 1 on miss trials and estimate the values of  $\gamma_A$  and  $\gamma_u$  for the hit trials.  
329 Although this could be reversed (e.g., set gains to 1 on hit trials and estimate values on miss trials), our  
330 convention seems more consistent with previous modeling studies of adaptation where the movements  
331 generally miss the target. We impose no additional constraint on the gain parameters; the effect of  
332 retention or updating can be larger or smaller on hit trials compared to miss trials. As with the  
333 Movement Reinforcement model, the Adaptation Modulation model has four free parameters.

334

335 The third model we consider here, the Dual Error model, postulates that learning is the composite of  
336 two model-based learning processes that operate on different error signals. The first is an adaptation  
337 process driven by SPE (as in Eqn. 1). The second process operates in the same manner as adaptation,  
338 but here the error signal is sensitive to the task outcome. This idea of a TE-sensitive process stems  
339 from previous studies in which an error is produced, not by perturbing the visual feedback of hand  
340 position, but rather by displacing the visual feedback of the target position (Magescas and Prablanc,  
341 2006; Cameron et al., 2010, 2010; Schmitz et al., 2010). The resulting mismatch between the hand  
342 position and displaced target position can be viewed as a TE rather than SPE, under the assumption  
343 that the veridical feedback of hand position roughly matches the predicted hand position (see  
344 Discussion). When this error signal is consistent (e.g., target is displaced in the same direction on every  
345 trial), a gradual change in heading angle is observed, similar to that seen in studies of visuomotor  
346 adaptation. Moreover, this form of learning is implicit: By shifting the target position during a saccade,  
347 just prior to the reach, the participants are unaware of the target displacement.

348

349 In the Dual Error model, the motor output is the sum of two processes:

350 
$$x_{\text{total}}(n) = x_{\text{spe}}(n) + x_{\text{te}}(n), \quad [\text{Equation 6}]$$

351 where

352 
$$x_{\text{spe}}(n+1) = A_{\text{spe}} * x_{\text{spe}}(n) + U_{\text{spe}} * (\text{SPE}) \quad [\text{Equation 7}]$$

353 
$$x_{\text{te}}(n+1) = A_{\text{te}} * x_{\text{te}}(n) + U_{\text{te}} * (\text{TE}), \quad [\text{Equation 8}]$$

354 Equation 7 is the same as in the other two models, describing adaptation from a sensory prediction  
355 error, but with the notation modified here to explicitly contrast with the second process. Eqn. 8  
356 describes a second model-based process, but one that is driven by the target error.

357

358 The SPE-sensitive process updates from the error term on every trial given that the SPE is always  
359 present, even on hit trials. In contrast, the TE-sensitive process only updates from the error term on  
360 miss trials. The error component of Eqn. 8 is absent on hit trials. This would account for the attenuated



361 learning observed in the large target (Hit) conditions in Experiments 1 and 2. In the context of our clamp  
362 experiments, TE is modeled as a step function (Fig. 4c), set to 0 when the cursor hits the target and 1  
363 when the cursor misses or straddles the target. However, if the cursor position varied (as in studies with  
364 contingent feedback), TE might take on continuous, signed values, similar to SPE.

365

366 We note that the Dual Error model is similar to the influential two-process state space model of  
367 adaption introduced by Smith and colleagues (Smith et al., 2006). In their model, dual-adaptation  
368 processes have different learning rates and retention factors, resulting in changes that occur over  
369 different time scales. Here the different learning rates and retention factors are related to the different  
370 error signals, TE and SPE. Whereas the dual-rate model imposes a constraint on the parameters (i.e.,  
371 process with faster learning must also have faster forgetting), the four parameters in the Dual Error  
372 model are unconstrained relative to each other.

373

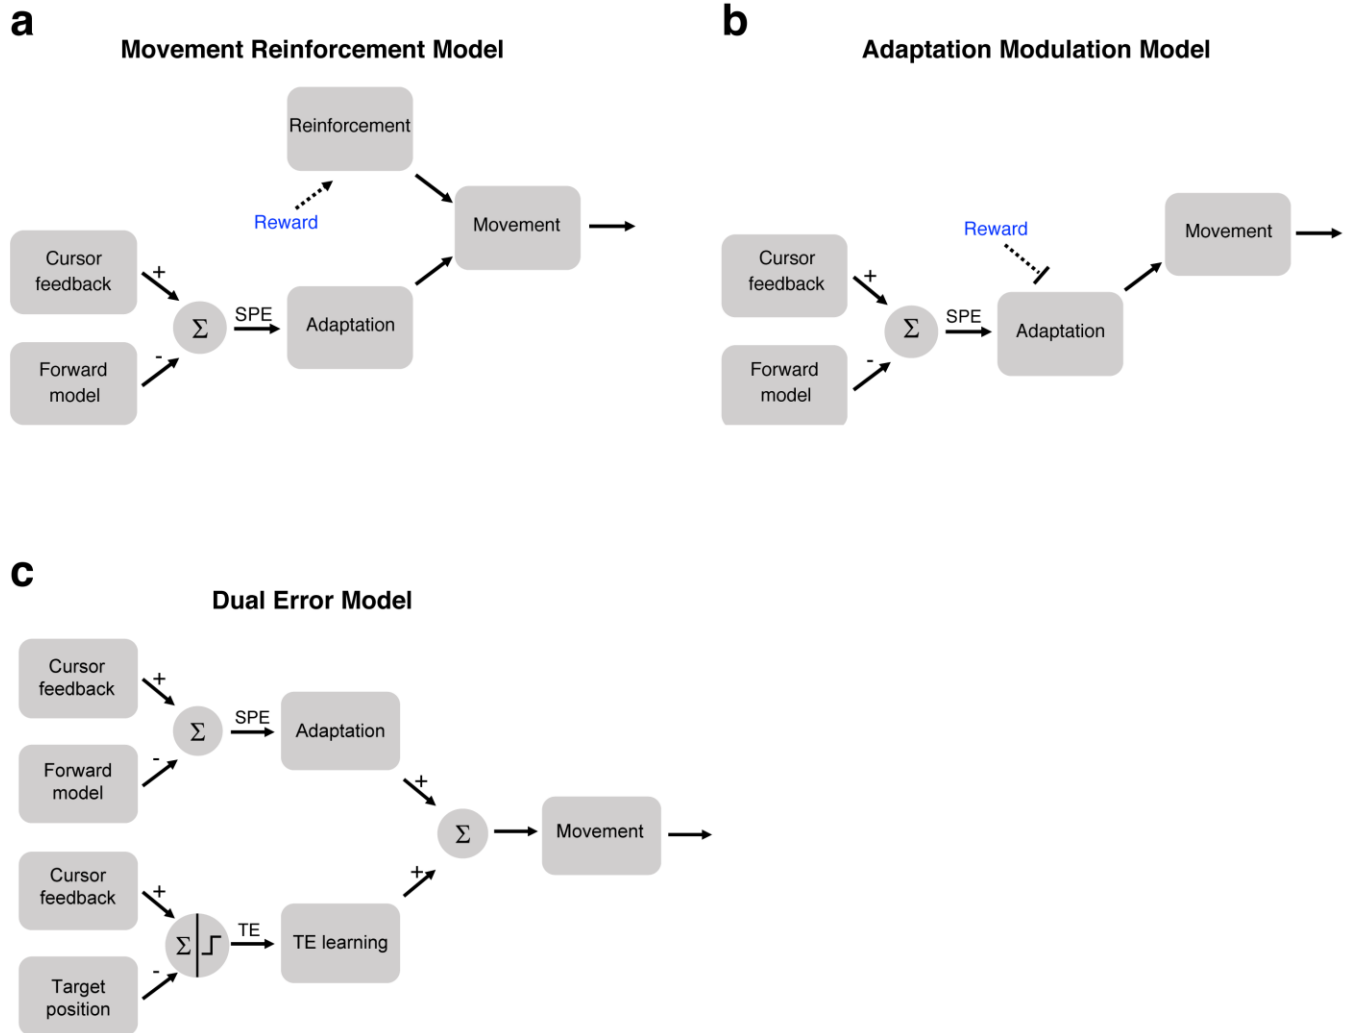

374

375 **Figure 4 Three models of how intrinsic reward or target error could affect learning. (a)** In the  
 376 Movement Reinforcement model, reward signals cause reinforcement learning processes to bias future  
 377 movements towards previously rewarded movements. The adaptation process is sensitive only to SPE  
 378 and not reward. The overall movement reflects a composite of the two processes. **(b)** In the Adaptation  
 379 Modulation model, reward directly attenuates adaptation to SPE. **(c)** In the Dual Error model, a second,  
 380 independent model-based process, one driven by TE, combines with SPE-based adaptation to modify  
 381 performance.  
 382

### 383 Experiment 3

384 The experimental design employed in Experiments 1 and 2 cannot distinguish between these three  
 385 models because all make qualitatively similar predictions. In the Movement Reinforcement model, the  
 386 attenuated asymptote in response to Hit conditions arises because movements are rewarded  
 387 throughout, including during early learning, biasing future movements towards baseline. The Adaptation

388 Modulation model predicts a lower asymptote during the Hit condition because the adaptation system is  
389 directly attenuated by reward. The Dual Error model similarly predicts a lower asymptote because only  
390 one of two learning processes is active when there is no target error.

391

392 In contrast to the single perturbation blocks used in Experiments 1 and 2, a transfer design in which the  
393 target size changes after an initial adaptation phase affords an opportunity to contrast the three models.

394 In Experiment 3, we tested two groups of participants ( $n=12/\text{group}$ ) with a  $1.75^\circ$  clamp, varying the  
395 target size between the first and second halves of the experiment (Fig. 5a). The key manipulation  
396 centered on the order of when the target was large (hit condition) or small (straddle condition).

397

398 For the Straddle-to-Hit group, a small target was used in an initial acquisition phase (first 120 clamp  
399 cycles). Based on the results of Experiments 1 and 2, we expect to observe a relatively large change in  
400 hand angle at the end of this phase since the outcome is always an effective “miss”. The key test  
401 comes during the transfer phase (final 80 clamp cycles), in which the target size is increased such that  
402 the invariant clamp now results in a target hit. For the Movement Reinforcement model, hitting the  
403 target will produce an intrinsic reward signal, reinforcing the associated movement. Therefore, there  
404 should be no change in performance (hand angle) following transfer since the SPE remains the same  
405 and the current movements are now reinforced (Fig. 5b). In contrast, both the Adaptation Modulation  
406 and Dual Error models predict that, following transfer to the large target, there will be a drop in hand  
407 angle, relative to the initial asymptote. For the former, hitting the target will attenuate the adaptation  
408 system; for the latter, hitting the target will shut down learning from the process that is sensitive to  
409 target error.

410

411 We also tested a second group in which the large target (hit) was used in the acquisition phase and the  
412 small target (effective “miss”) in the transfer phase (Hit-to-Straddle group). All three models make the  
413 same qualitative predictions for this group. At the end of the acquisition phase, there should be a

414 smaller change in hand angle compared to the Straddle-to-Hit group, due to the persistent target hits.  
415 Following transfer, all three models predict an increase in hand angle, relative to the initial asymptote.  
416 For the Movement Reinforcement model, the reduction in target size removes the intrinsic reward  
417 signal, which over time, lessens the contribution of the reinforcement process as the learned movement  
418 biases decay in strength. The Adaptation Modulation model predicts that hand angle will increase due  
419 to the removal of the attenuating effect on adaptation following transfer. The Dual Error model also  
420 predicts an increase in hand angle, but here the effect occurs because the introduction of a target error  
421 activates the second implicit learning process. Although the Hit-to-Straddle group does not provide a  
422 discriminative test between the three models, the inclusion of this group does provide a second test of  
423 each model, as well as an opportunity to rule out alternative hypotheses for the behavioral effects at  
424 transfer. For example, the absence of a change at transfer might be due to reduced sensitivity to the  
425 clamp following a long initial acquisition phase.

426

### 427 *Experiment 3 – Behavioral Analyses*

428 For our analyses, we first examined performance during the acquisition phase. Consistent with the  
429 results from Experiments 1 and 2, the Hit-to-Straddle Target group adapted slower than the Straddle-to-  
430 Hit group (95% CI [-.17°/cycle, -.83°/cycle],  $t(22)=-3.15$ ,  $p=.005$ ,  $d=1.29$ ; Fig. 5c) and reached a lower  
431 asymptote (95% CI [-5.25°, -15.29°],  $t(22)=-4.24$ ,  $p=.0003$ ,  $d=1.73$ ; permutation test:  $p=.0003$ ; Fig. 5d).  
432 The reduction at asymptote was approximately 45%.

433

434 We next examined performance during the transfer phase where the target size reversed for the two  
435 groups. Our primary measure of behavioral change for each subject was the difference in late learning  
436 (average hand angle over last 10 cycles) between the end of the acquisition phase and the end of the  
437 transfer phase. As seen in Fig. 5d, the two groups showed opposite changes in behavior in the transfer  
438 phase, evident by the strong (group x phase) interaction ( $F(2,33)=43.1$ ,  $p<10^{-7}$ , partial  $\eta^2=.72$ ). The

439 results of a within-subjects t-test showed that the Hit-to-Straddle group showed a marked increase in  
440 hand angle following the decrease in target size (95% CI [4.9°, 9.1°],  $t(11)=7.42$ ,  $p<.0001$ ,  $d_z=2.14$ ; Fig.  
441 5e), consistent with the predictions for all three models.

442

443 The Straddle-to-Hit group's transfer performance provides an opportunity to compare differential  
444 predictions, and in particular, to pit the Movement reinforcement model against the other two models.  
445 Following the switch to the large target, there was a decrease in hand angle. Applying the same  
446 statistical test, the mean decrement in hand angle was 5.7° from the final cycles of the training phase to  
447 the final cycles of the transfer phase (95% CI [-3.1°, -8.2°],  $t(11)=-4.84$ ,  $p=.0005$ ,  $d_z=1.40$ ; Fig. 5e). This  
448 result is consistent with the prediction of the Adaptation Modulation and Dual Error models. In contrast,  
449 the reduction in hand angle cannot be accounted for by the Movement Reinforcement model.

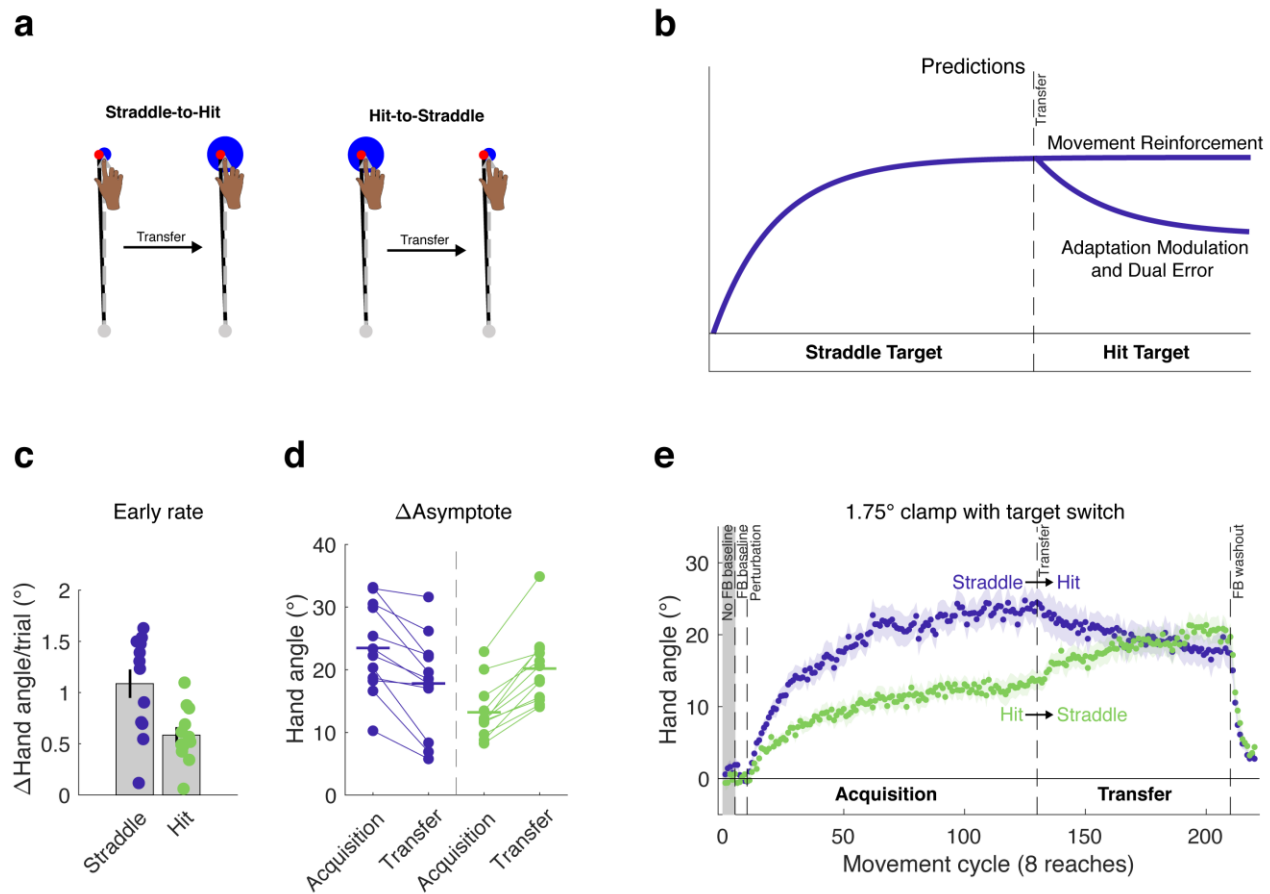

450

451 **Figure 5 Within-subject transfer design to evaluate models of the impact of task outcome on**  
 452 **implicit motor learning.** (a) Using a transfer design, (b) the models diverge in their behavioral  
 453 predictions for the Straddle-to-Hit group following transfer. The Movement Reinforcement  
 454 model predicts a persistent asymptote following transfer, whereas the Adaptation Modulation  
 455 and Dual Error models predict a decay in hand angle. During the acquisition phase, we again  
 456 observed differences between the Hit and Straddle groups in the (c) early adaptation rate  
 457 as well as (d) late learning. All participants in both groups demonstrated changes in reach  
 458 angle consistent with the Adaptation Modulation and Dual Error models. (e) The learning  
 459 functions were inconsistent with the Movement Reinforcement model. Note that the rise in  
 460 hand angle for the Hit-to-Straddle group is consistent with all three models. Dots represent  
 461 individuals; shading and error bars denote SEM.

462 **Source data 3** This file contains hand angle data for each trial and participant in Experiment 3,  
 463 and was used to generate Figure 5c-e and Figure 5-figure supplement 1. Reaction times (RTs)  
 464 and movement times (MTs) are also included. Note that hand angles were flipped for  
 465 participants who experienced a counter-clockwise clamp.  
 466

467

468

469 *Experiment 3 -- Modeling Results*

470 We evaluated the three models by simultaneously fitting group-averaged data for both groups. As  
471 depicted in Fig. 6, all three models capture the initial plateau followed by increased learning of the Hit-  
472 to-Straddle group. However, the quality of the fits diverges for the Straddle-to-Hit group, where the  
473 Movement Reinforcement model cannot produce a decrease in hand angle once the large target is  
474 introduced. Instead, the best-fit parameters for this model result in an asymptote that falls between the  
475 hand angle values observed during the latter part of each phase. In contrast, the Adaptation Modulation  
476 and Dual Error models both predict the drop in hand angle during the second phase of the experiment  
477 for the Straddle-to-Hit group.

478

479 Consistent with the preceding qualitative observations, the Movement Reinforcement model yielded a  
480 lower  $R^2$  value and higher Akaike Information Criterion (AIC) score (higher AIC indicates relatively  
481 worse fit) than the Adaptation Modulation and Dual Error models (Table 1). A comparison of the latter  
482 two shows that the Dual Error model provides the best account of the results. This model yielded a  
483 lower AIC score and accounted for 90% of the variance in the group-averaged data compared to 86%  
484 for the Adaptation Modulation model.

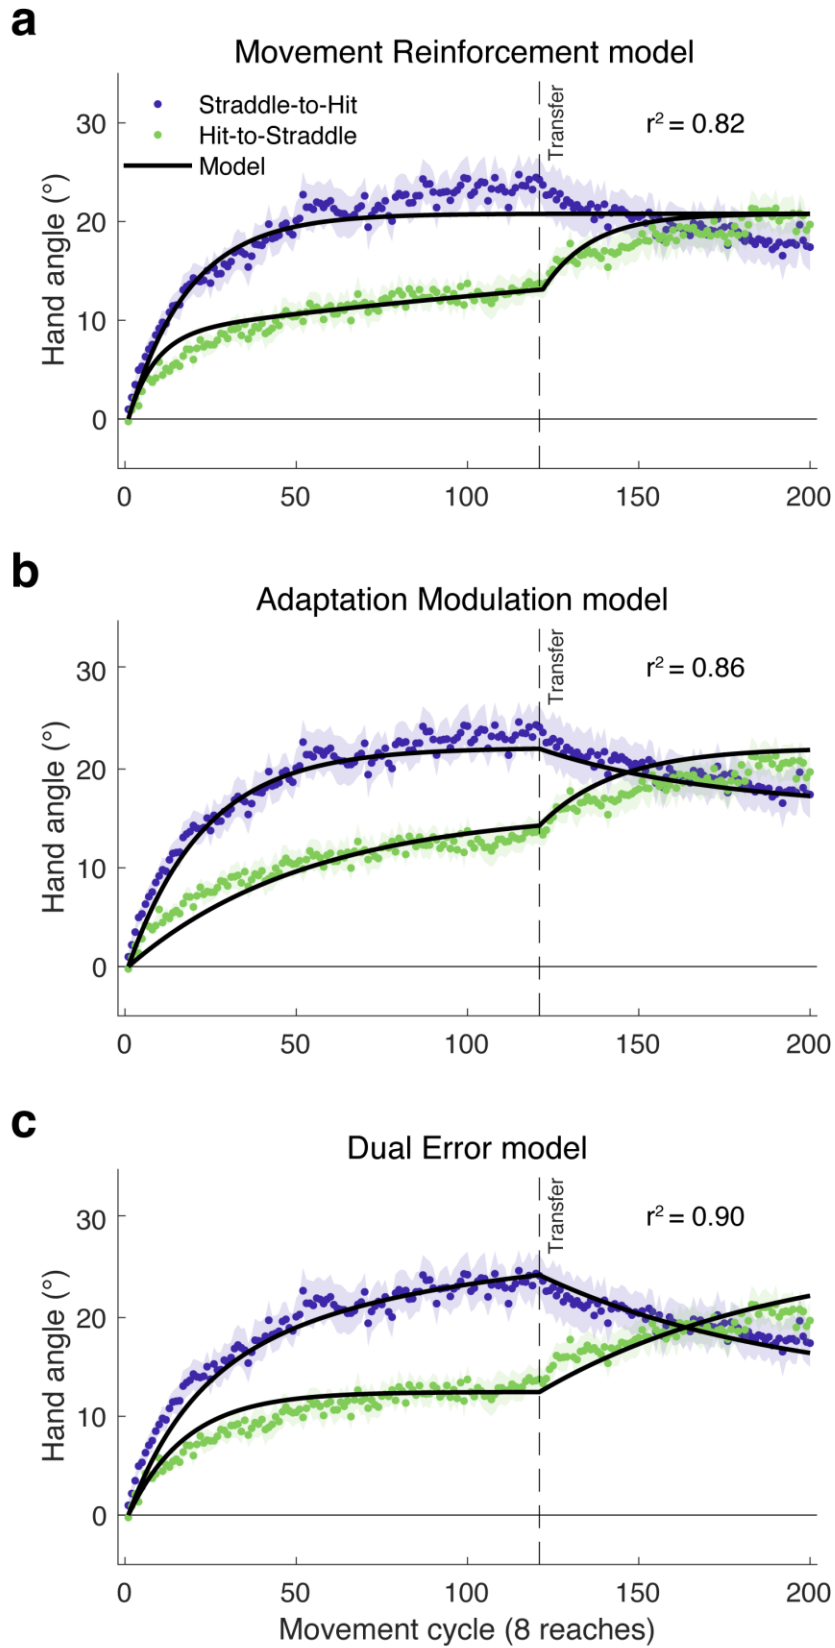



486 **Figure 6 Model fits of the learning functions from Experiment 3.** The failure of the **(a)** Movement  
487 Reinforcement model to qualitatively capture the decay in hand angle following transfer in the Straddle-  
488 to-Hit condition argues against the idea that the effect of task outcome arises solely from a model-free  
489 learning process that operates independent of model-based adaptation. In contrast, both the **(b)**  
490 Adaptation Modulation and **(c)** Dual Error models accurately predict the changes in hand angle  
491 following transfer in both the Hit-to-Straddle and Straddle-to-Hit conditions.  
492

493 To understand whether the effects of target size were due to changes in learning or retention, we  
494 examined the parameter estimates for the Adaptation Modulation and Dual Error models. We first  
495 generated 1000 bootstrapped samples of group-averaged behavior by resampling with replacement  
496 from each group. We then fit each of the bootstrapped samples simultaneously and report the results  
497 here in terms of 95% confidence intervals. The parameter estimates indicate that the learning rate  
498 parameter was very sensitive to the two task outcome conditions. For the Adaptation Modulation model,  
499 the estimates of  $\gamma_u \cdot U$  were larger during miss than hit conditions, with no overlap of the confidence  
500 intervals ([.693, 1.302] vs [.182, .573], respectively); thus, the error-driven adjustment in the state of the  
501 internal model was much larger after a miss than a hit. For the Dual Error model, the estimates of  $U_{spe}$   
502 were larger than for  $U_{te}$ , again with no overlap of the confidence intervals [(.414, 1.08), vs [.157, .398]],  
503 indicating that the state change was more strongly driven by SPE than TE. For each model, the  
504 process that produced a larger error-based update in the internal model also had the lower retention  
505 factor, although here there was overlap in the 95% confidence intervals for the latter ( $\gamma_r \cdot A$  for Miss:  
506 [.939,.969] vs Hit: [.961,.989];  $A_{spe}$ : [.900,.972] vs  $A_{te}$ : [.938,.993]). In sum, the impact of task outcome  
507 (hit or miss) was primarily manifest in the estimates of the learning rate parameters.

508

509 The behavioral pattern observed in Experiment 3, complemented by the modeling results, are  
510 problematic for the Movement Reinforcement model, challenging the idea that the effect of task  
511 outcome arises solely from a model-free learning process that operates independent of model-based  
512 adaptation. However, this does not exclude the possibility that task outcome information influences both  
513 model-free and model-based processes. For example, hitting the target might not only reinforce an

514 executed movement, but might also modulate adaptation. Formally, this hypothesis would correspond  
515 to a hybrid model that combines the Adaptation Modulation and Movement Reinforcement models.  
516 Indeed, hybrids that combine the Movement Reinforcement model with either the Adaptation  
517 Modulation or Dual Error models (see Methods) yield improved model fits and lower AIC values, with  
518 the two hybrids producing comparable values (see Table 1).

519

520 **Table 1: Model evaluations.**

| <b>Basic Models</b>                            | <b># of free parameters</b> | <b>R-squared</b> | <b>AIC</b> |
|------------------------------------------------|-----------------------------|------------------|------------|
| Movement Reinforcement                         | 4                           | .824             | 363        |
| Adaptation Modulation                          | 4                           | .861             | 269        |
| Dual Error                                     | 4                           | .895             | 156        |
| <b>Hybrid Models</b>                           |                             |                  |            |
| Movement Reinforcement + Adaptation Modulation | 6                           | .945             | -100       |
| Movement Reinforcement + Dual Error            | 6                           | .945             | -97        |

521

522

523 *Control group for testing perceptual uncertainty hypothesis*

524 Across the three experiments, the amount of learning induced by clamped visual feedback was  
525 attenuated when participants reached to the large target. We considered if this effect could be due, in  
526 part, to the differences between the Hit and Straddle/Miss conditions in terms of perceptual uncertainty.  
527 For example, the reliability of the visual error signal might be weaker if the cursor is fully embedded  
528 within the target; in the extreme, failure to detect the angular offset might lead to the absence of an  
529 error signal on some percentage of the trials.

530

531 To evaluate this perceptual uncertainty hypothesis, we tested an additional group in Experiment 3 with  
532 a large target, but modified the display such that a bright line, aligned with the target direction, bisected  
533 the target (Figure 5-figure supplement 1). With this display, the feedback cursor remained fully  
534 embedded in the target, but was clearly off-center. If the attenuation associated with the large target is

535 due to perceptual uncertainty, then the inclusion of the bisecting line should produce an adaptation  
536 effect similar to that observed with small targets. Alternatively, if perceptual uncertainty does not play a  
537 prominent role in the target size effect, then the adaptation effects would be similar to that observed  
538 with large targets.

539

540 Consistent with the second hypothesis, performance during the acquisition phase for the group  
541 reaching to a bisected target was similar to that of the group reaching to the standard large target (Hit-  
542 to-Straddle, see Supplement). To provide support for this observation, we first performed an omnibus  
543 one-way ANOVA on the late learning data at the end of the acquisition phase, given our analysis plan  
544 entailed multiple planned pair-wise comparisons. There was a significant effect of group ( $F(2,33)=9.33$ ,  
545  $p=.0006$ ,  $\eta^2=.36$ ). Subsequent planned pair-wise comparisons showed no significant differences  
546 between the bisected target and standard large target (Hit-to-Straddle) groups (early adapt: 95% CI [-  
547  $.34^\circ/\text{cycle}$ ,  $.22^\circ/\text{cycle}$ ],  $t(22)=-.47$ ;  $p=.64$ ;  $d=.19$ ; late learning: 95% CI [ $-7.80^\circ$   $1.19^\circ$ ],  $t(22)=-1.52$ ;  $p=.14$ ;  
548  $d=.62$ ). In contrast, the group reaching to bisected targets showed slower early adaptation rates (95%  
549 CI [ $-.81^\circ/\text{cycle}$ ,  $-.07^\circ/\text{cycle}$ ],  $t(22)=-2.49$ ,  $p=.02$ ,  $d=1.02$ ) and lower magnitudes of late learning (95% CI  
550 [ $-12.58^\circ$ ,  $-1.35^\circ$ ],  $t=-2.57$ ,  $p=0.017$ ,  $d=1.05$ ) when compared with the group reaching to small targets  
551 (Straddle-to-Hit).

552

553 During the transfer phase, the target size for the perceptual uncertainty group remained large, but the  
554 bisection line was removed. If perceptual uncertainty underlies the effect we have attributed to hitting  
555 the target, we would expect to observe a decrease in hand angle following transfer, since uncertainty  
556 would increase. However, following transfer to the non-bisected large target, there was no change in  
557 asymptote (95% CI [ $-.87^\circ$ ,  $2.32^\circ$ ],  $t(11)=1.0$ ,  $p=.341$ ,  $d_z=.29$ ). In sum, the results from this control group  
558 indicate that the attenuated adaptation observed when the cursor is fully embedded within the target is  
559 not due to perceptual uncertainty,

560

## 561 **DISCUSSION**

562 Models of sensorimotor adaptation have emphasized that this form of learning is driven by sensory  
563 prediction errors, the difference between the observed and predicted sensory consequences of a  
564 movement. In this formulation, task outcome, defined as hitting or missing the target, is not part of the  
565 equation (although in most adaptation tasks, the sensory prediction is at the target, thus conflating SPE  
566 and task outcome). While a number of recent studies have demonstrated that task outcome signals can  
567 influence overall performance in these tasks (Galea et al., 2015; Reichenthal et al., 2016; Leow et al.,  
568 2018), it is unclear whether these reinforcement signals impact sensorimotor adaptation (Shmuelof et  
569 al., 2012; Galea et al., 2015), or whether they are exploited by other learning systems, distinct from  
570 SPE-driven implicit adaptation (Codol et al., 2018; Holland et al., 2018).

571

572 The interpretation of the results from these studies is complicated by the fact that the experimental  
573 tasks may conflate different learning processes. In the present study, we sought to avoid this  
574 complication by employing a new method to study implicit learning, one in which participants are  
575 specifically instructed to ignore an invariant visual error signal, thus eliminating explicit processes  
576 (Morehead et al., 2017). Using this clamp method, we observed a striking difference between  
577 conditions in which the final position of the cursor was fully embedded in the target compared to  
578 conditions in which the cursor either terminated outside or straddled the target: When the cursor was  
579 fully embedded, the rate of learning was reduced and the asymptotic level of learning was markedly  
580 attenuated.

581

### 582 *Characterizing the Information Associated with Task Outcome*

583 We manipulated task outcome by varying the size of the target, and, across experiments, manipulated  
584 SPE by varying the clamp size. Although the experimental instructions remained unchanged, these  
585 stimulus changes might be expected to also influence the perception of the error or motor planning

586 processes. However, the behavioral differences arising from the manipulation of task outcome did not  
587 appear to arise from these factors. Movement kinematics were essentially the same when reaching to  
588 the different sized targets, and the perceptual control condition showed that reducing perceptual  
589 uncertainty did not influence performance. Moreover, the finding in Experiment 1 that the Straddle  
590 group performed similar to the Miss group, suggests that the effect of target size is, to some degree,  
591 categorical rather than continuous.

592

593 With clamped visual feedback, participants have no control over the invariant task outcome. In our  
594 earlier work with this method, we hypothesized that the cursor feedback is interpreted by the adaptation  
595 system as an error signal. We assume the adaptation system is “fooled” by the temporal correlation  
596 between the motion of the hand and feedback signal, even though the participants are fully aware that  
597 the angular position of the cursor is causally unrelated to their behavior (Morehead et al., 2017). This  
598 hypothesis is consistent with earlier work showing that SPEs will drive implicit adaptation, even at the  
599 cost of reduced task success (Mazzoni and Krakauer, 2006; Taylor and Ivry, 2011).

600

601 One interpretation of the effect of task outcome is that an automatic signal is generated when the  
602 cursor hits the target; that is, this outcome is intrinsically rewarding (Huang et al., 2011; Leow et al.,  
603 2018), even though the participant is aware that the outcome does not depend on the accuracy of their  
604 movements. In two of our proposed models, we assume that hitting the target leads to the automatic  
605 generation of a positive reinforcement signal. In the Movement Reinforcement model, this signal  
606 strengthens associated movement representations, producing a bias on behavior. In the Adaptation  
607 Modulation model, this signal directly attenuates adaptation. Alternatively, one could emphasize the  
608 other side of the coin, namely, that the absence of reward (i.e., missing the target) results in a negative  
609 reinforcement signal, or what we refer to here as target error. Consideration of two types of error  
610 signals is, of course, central to the Dual Error model. We could also reframe the Adaptation Modulation

611 model: Rather than view adaptation as being attenuated following a positive task outcome, it may be  
612 that adaptation is enhanced following a negative task outcome.

613

614 With the current procedure, we do not have evidence, independent of the behavior, that the task  
615 outcome with non-contingent feedback results in a reinforcement signal (either positive or negative).  
616 Methods such as fMRI (Daw et al., 2011) or pupillometry (Manohar et al., 2017) could provide an  
617 independent means to assess the presence of well-established signatures of reward. Nonetheless, our  
618 results indicate, more generally, that task outcome is an important factor mediating the rate and  
619 magnitude of implicit motor learning.

620

#### 621 *Modeling the Influence of Task Outcome on Implicit Changes in Performance*

622 Our modeling analysis makes clear that parallel, independent activity of purely SPE-driven adaptation  
623 and task outcome-driven operant reinforcement processes cannot account for the behavioral changes  
624 observed in the present set of experiments. In particular, the Movement Reinforcement Model fails to  
625 predict the change in reach direction observed when the target size was decreased in the Straddle-to-  
626 Hit condition of Experiment 3. In this model, the Straddle-to-Hit group's asymptotic learning during the  
627 acquisition phase is due to the isolated operation of the adaptation system, given that none of the  
628 reaches are rewarded. The SPE signal would be expected to persist following transfer, maintaining this  
629 asymptote. Moreover, movements in this direction would be further strengthened given that, with the  
630 introduction of the large target, they would be reinforced by an intrinsic reward signal. Importantly, the  
631 predicted absence of behavioral change following transfer should hold for all models in which a model-  
632 free reinforcement-based process is combined with a task outcome-insensitive model-based adaptation  
633 process. For example, the prediction is independent of whether the reinforcement process follows a  
634 different time course than adaptation (e.g., faster or slower), or if we model the effect of reinforcement  
635 as basis functions (Donchin et al., 2003; Tanaka et al., 2012; Taylor et al., 2013) rather than discrete  
636 units. Thus, we propose that any model in which adaptation and reinforcement processes act

637 independently will fail to show the observed decrease in hand angle following transfer from a miss  
638 condition to a hit condition.

639

640 The failure of the Movement Reinforcement model requires that we consider alternatives in which  
641 information about the task outcome interacts with model-based processes. The Adaptation Modulation  
642 model postulates that a signal associated with the task outcome directly modulates the adaptation  
643 process. In the current instantiation, we propose that hitting the target results in an intrinsic reward  
644 signal that reduces the gain on adaptation (Leow et al., 2018), although an alternative interpretation  
645 would be that missing the target results in an error signal that amplifies the gain. This model was able  
646 to account for the reduced asymptote observed in the Hit-to-Straddle condition of Experiment 3,  
647 outperforming the Movement Reinforcement model.

648

649 The Adaptation Modulation model makes explicit assumptions of previous work in which reward was  
650 proposed to act as a gain controller on the adaptation process (Galea et al., 2015; Nikooyan and  
651 Ahmed, 2015). In terms of the standard state space model, the results indicate that the main effect of  
652 task outcome was on the learning rate parameter. Hitting the target reduced the learning rate by  
653 approximately 40%, consistent with other studies showing reduced behavioral changes when hitting the  
654 target (Reichenthal et al., 2016; Leow et al., 2018).

655

656 Galea et al. (2015) also used a model-based approach to examine the influence of reinforcement on  
657 adaptation, comparing conditions in which participants received or lost money during a standard  
658 visuomotor rotation task. Their results indicated that reward had a selective effect on the retention  
659 parameter in the state space model, suggesting the effect was on memory rather than learning. We  
660 also observed higher retention parameters when the cursor hit the target, although the effect size here  
661 was a relatively smaller ~3% increase and not reliably different from the miss/straddle condition, based  
662 on bootstrapped parameter estimates. We suspect that the effect on retention in Galea et al. (2015)

663 was, in large part, not due to a change in the adaptation process itself, but rather the residual effects of  
664 an aiming strategy induced by the reward. That is, the monetary rewards might have reinforced a  
665 strategy during the rotation block, and this carried over into the washout block. Indeed, the idea that  
666 reward impacts strategic processes has been advanced in studies comparing conditions in which the  
667 performance could be enhanced by re-aiming (Codol et al., 2018; Holland et al., 2018). By using non-  
668 contingent clamped feedback, we eliminate strategy use and thus provide a purer assessment of how  
669 reward influences adaptation.

670

671 We recognize that the hypothesized modulation of sensorimotor adaptation by task outcome is, at least  
672 superficially, contrary to previous conjectures concerning the independent effects of SPE and TE  
673 (Mazzoni and Krakauer, 2006; Taylor and Ivry, 2011; Taylor et al., 2014; Morehead et al., 2017; Kim et  
674 al., 2018). One argument for independence comes from a visuomotor adaptation task in which  
675 participants are instructed to use an aiming strategy to compensate for a large visuomotor rotation  
676 (Mazzoni and Krakauer, 2006; Taylor and Ivry, 2011). By using the instructed strategy, the cursor  
677 immediately intersects the target, eliminating the target error. However, over the course of subsequent  
678 reaches, the participants' performance deteriorates, an effect attributed to the persistence of an SPE,  
679 the difference between the aiming location and cursor position. Taylor and Ivry (2011) modeled this  
680 behavior by assuming the operation of two independent learning processes, adaptation driven by SPE  
681 and strategy adjustment driven by TE. In light of the present results, it is important to note that there  
682 were actually very few trials in which target hits actually occurred, given that the large SPE on the initial  
683 reaches resulted in target misses on almost all trials. In addition, the strength of a task success signal  
684 may fall off with larger SPEs (Cashaback et al., 2017). As such, the current study, in which SPE and  
685 task outcome are held constant throughout learning, provides a much stronger assessment on the  
686 effect of task outcome on sensorimotor adaptation.

687



688 The Dual Error model suggests an alternative, model-based account of the effect of task outcome on  
689 performance. This model assumes that performance is the composite of two independent error-based  
690 processes, an adaptation system that is sensitive to SPE, and a second implicit process that is  
691 sensitive to target error. Of the three models tested here, the Dual Error model provided the best  
692 account of the behavior in Experiment 3, accounting for 90% of the variance when the group-averaged  
693 data from both the Straddle-to-Hit and Hit-to-Straddle conditions of Experiment 3 were fit  
694 simultaneously.

695

696 Interestingly, in previous work, TE was thought to be a driving signal for explicit learning, and in  
697 particular, for adjusting a strategic aiming process that can lead to rapid improvements in performance  
698 (Taylor and Ivry, 2011; Taylor et al., 2014; McDougle et al., 2015; Day et al., 2016). Conceptualizing  
699 TE-based learning as supporting an explicit process does not appear warranted here. We have no  
700 evidence, either based on performance or verbal reports obtained during post-experiment debriefing  
701 sessions (Kim et al., 2018), that participants employ a strategy to counteract the clamp. Rather, all of  
702 the observed changes in behavior are implicit.

703

704 Alternatively, we can consider whether the TE-based process constitutes a form of implicit aiming. The  
705 notion of implicit aiming has previously been suggested in work showing that, with extended practice,  
706 strategic aiming may become automatized (Huberdeau et al., 2017). One interpretation of this effect is  
707 that aiming strategies eventually become “cached” and are automatically retrieved during response  
708 preparation (Haith and Krakauer, 2018). While the idea of a cached strategy may be reasonable in the  
709 context of traditional sensorimotor perturbation studies, it does not seem to offer a reasonable  
710 psychological account of the effect of task outcome in the current context. Given that participants do not  
711 employ a strategy to counteract the clamp, there is no strategy to cache. Furthermore, parameter  
712 estimates for the Dual Error model indicate that the TE-sensitive process learned at a slower rate and  
713 retained more than the SPE-sensitive process. Were implicit aiming to share core features of explicit

714 aiming, the modeling results would be inconsistent with previous work indicating that explicit aiming  
715 from TE is faster (McDougle et al., 2015) and more flexible (Bond and Taylor, 2015; Hutter and Taylor,  
716 2018) than adaptation from SPE.

717

718 Although the Dual Error model provided a better fit of the behavioral results compared to the Adaptation  
719 Modulation model, the challenge for future research is to design experiments that can evaluate their  
720 unique predictions. The current experiments, by manipulating the size of the target to vary TE while  
721 holding SPE constant, highlights the distinctive roles of these two outcome signals. We can envision  
722 experiments in which SPE is eliminated (by using a 0° clamp), but the target jumps by a small amount,  
723 with the size of the displaced target manipulated such that the cursor either misses or hits the target.  
724 The Dual Error model, as presently formulated would predict learning in the former, but not in the latter.  
725 The Adaptation Modulation model, on the other hand, would predict no learning in either case since  
726 there is no SPE.

727

728 In terms of neural mechanisms, converging evidence points to a critical role for the cerebellum in SPE-  
729 driven sensorimotor adaptation (Tseng et al., 2007; Taylor et al., 2010; Izawa et al., 2012; Schlerf et al.,  
730 2012; Butcher et al., 2017), including the observation that patients with cerebellar degeneration show a  
731 reduced response to visual error clamps (Morehead et al., 2017). An important question for future  
732 research is whether the cerebellum is also essential for learning driven by information concerning task  
733 outcome. A recent behavioral study showed that individuals with cerebellar degeneration were  
734 unimpaired in learning from binary, reward-based feedback, once the motor variability associated with  
735 their ataxia was taken into consideration (Therrien et al., 2016). This finding provides one instance in  
736 which the cerebellum is not essential for learning from task outcome. However, the complete retention  
737 observed in that study would indicate that learning was of a different form than adaptation, perhaps  
738 related to the use of an explicit strategy (Holland et al., 2018). Evidence that the cerebellum may be  
739 integral to processing task outcome signals that could support implicit processes comes from research

740 with animal models indicating that both simple (Wagner et al., 2017) and complex (Ohmae and Medina,  
741 2015) spike activity in the cerebellum may signal information about task outcome and reward prediction  
742 errors. By testing individuals with cerebellar impairment on a clamp design in which SPE is held  
743 constant and TE is manipulated, one can simultaneously assess the role of the cerebellum in learning  
744 from these two error signals.

745

#### 746 *Conclusions*

747 By using non-contingent feedback, we were able to re-examine the effect of task outcome on  
748 sensorimotor learning. The results clearly show that 1) implicit learning processes are influenced by  
749 information concerning task outcome, either through the generation of an intrinsic reward or task error  
750 signal and 2) that the effect cannot be accounted for by the engagement of a model-based SPE-driven  
751 adaptation process operating in tandem with an independent model-free operant reinforcement  
752 process. The behavioral results and our modeling work indicate the need for a more nuanced view of  
753 sensorimotor adaptation. We outline two directions to consider. In the Adaptation Modulation model,  
754 task outcome signals are proposed to serve as a gain on adaptation, contrary to previous views of a  
755 modular system that is immune to information about task success. The Dual Error model suggests the  
756 need for a more expansive definition of adaptation in which multiple model-based processes operate to  
757 keep the sensorimotor system well-calibrated. These models can serve as a springboard for future  
758 research designed to further delineate how information about motor execution and task outcome  
759 influence implicit sensorimotor learning.

760

761

762

763

764

765

766 **ACKNOWLEDGMENTS**

767 We thank Matthew Hernandez and Wendy Shwe for assistance with data collection. We are also  
768 grateful to Maurice Smith, Ryan Morehead, Guy Avraham, and Ian Greenhouse for helpful discussions  
769 regarding this work.

770

771

772 **Competing Interests**

773 No competing interests, financial or otherwise, are declared by the authors.

774

775

776 **Ethics**

777 Human subjects: All participants provided written informed consent to participate in the study and to  
778 allow publication of their data, and received financial compensation for their participation. The  
779 Institutional Review Board at UC Berkeley approved all experimental procedures under ID number  
780 2016-02-8439.

781 **REFERENCES**

- 782 Bond KM, Taylor JA (2015) Flexible explicit but rigid implicit learning in a visuomotor adaptation task. *J*  
783 *Neurophysiol* 113:3836–3849.
- 784 Butcher PA, Ivry R, Kuo S-H, Rydz D, Krakauer JW, Taylor JA (2017) The Cerebellum Does More Than  
785 Sensory-Prediction-Error-Based Learning In Sensorimotor Adaptation Tasks. bioRxiv:139337.
- 786 Cameron BD, Franks IM, Inglis JT, Chua R (2010) Implicit motor learning from target error during  
787 explicit reach control. *Exp Brain Res* 206:99–104.
- 788 Cashaback JGA, McGregor HR, Mohatarem A, Gribble PL (2017) Dissociating error-based and  
789 reinforcement-based loss functions during sensorimotor learning. *PLOS Comput Biol*  
790 13:e1005623.
- 791 Castro LNG, Monsen CB, Smith MA (2011) The Binding of Learning to Action in Motor Adaptation.  
792 *PLOS Comput Biol* 7:e1002052.
- 793 Churchland MM, Afshar A, Shenoy KV (2006) A Central Source of Movement Variability. *Neuron*  
794 52:1085–1096.
- 795 Codol O, Holland PJ, Galea JM (2017) The relationship between reinforcement and explicit strategies  
796 during visuomotor adaptation. bioRxiv:206284.
- 797 Codol O, Holland PJ, Galea JM (2018) The relationship between reinforcement and explicit control  
798 during visuomotor adaptation. *Sci Rep* 8:9121.
- 799 Daw ND, Gershman SJ, Seymour B, Dayan P, Dolan RJ (2011) Model-Based Influences on Humans’  
800 Choices and Striatal Prediction Errors. *Neuron* 69:1204–1215.
- 801 Day KA, Roemmich RT, Taylor JA, Bastian AJ (2016) Visuomotor Learning Generalizes Around the  
802 Intended Movement. *eNeuro* 3 Available at:  
803 <http://www.ncbi.nlm.nih.gov/pmc/articles/PMC4894913/> [Accessed September 21, 2017].
- 804 Donchin O, Francis JT, Shadmehr R (2003) Quantifying Generalization from Trial-by-Trial Behavior of  
805 Adaptive Systems that Learn with Basis Functions: Theory and Experiments in Human Motor  
806 Control. *J Neurosci* 23:9032–9045.
- 807 Fitts PM (1992) The information capacity of the human motor system in controlling the amplitude of  
808 movement. *J Exp Psychol Gen* 121:262–269.
- 809 Galea JM, Mallia E, Rothwell J, Diedrichsen J (2015) The dissociable effects of punishment and reward  
810 on motor learning. *Nat Neurosci* 18:597–602.
- 811 Gallivan JP, Logan L, Wolpert DM, Flanagan JR (2016) Parallel specification of competing  
812 sensorimotor control policies for alternative action options. *Nat Neurosci* 19:320–326.
- 813 Georgopoulos AP, Schwartz AB, Kettner RE (1986) Neuronal population coding of movement direction.  
814 *Science* 233:1416–1419.
- 815 Gordon J, Ghilardi MF, Ghez C (1994) Accuracy of planar reaching movements - I. Independence of  
816 direction and extent variability. *Exp Brain Res* 99:97–111.

- 817 Hadjosif A, Smith M (2013) Savings is restricted to the temporally labile component of motor  
818 adaptation. In: *Translational and Computational Motor Control (TCMC)*. San Diego, CA.
- 819 Haith AM, Krakauer JW (2018) The multiple effects of practice: skill, habit and reduced cognitive load.  
820 *Curr Opin Behav Sci* 20:196–201.
- 821 Holland PJ, Codol O, Galea JM (2018) The contribution of explicit processes to reinforcement-based  
822 motor learning. *J Neurophysiol* Available at: [https://www-physiology-](https://www-physiology-org.libproxy.berkeley.edu/doi/abs/10.1152/jn.00901.2017)  
823 [org.libproxy.berkeley.edu/doi/abs/10.1152/jn.00901.2017](https://www-physiology-org.libproxy.berkeley.edu/doi/abs/10.1152/jn.00901.2017) [Accessed May 17, 2018].
- 824 Huang VS, Haith A, Mazzoni P, Krakauer JW (2011) Rethinking motor learning and savings in  
825 adaptation paradigms: model-free memory for successful actions combines with internal  
826 models. *Neuron* 70:787–801.
- 827 Huberdeau DM, Krakauer JW, Haith AM (2015) Dual-process decomposition in human sensorimotor  
828 adaptation. *Curr Opin Neurobiol* 33:71–77.
- 829 Huberdeau DM, Krakauer JW, Haith AM (2017) Practice induces a qualitative change in the memory  
830 representation for visuomotor learning. *bioRxiv*:226415.
- 831 Hutter SA, Taylor JA (2018) Relative sensitivity of explicit re-aiming and implicit motor adaptation.  
832 Available at: <http://biorxiv.org/lookup/doi/10.1101/308510> [Accessed September 14, 2018].
- 833 Izawa J, Criscimagna-Hemminger SE, Shadmehr R (2012) Cerebellar contributions to reach adaptation  
834 and learning sensory consequences of action. *J Neurosci* 32:4230–4239.
- 835 Izawa J, Shadmehr R (2011) Learning from sensory and reward prediction errors during motor  
836 adaptation. *PLoS Comput Biol* 7:e1002012–e1002012.
- 837 Kim HE, Morehead JR, Parvin DE, Moazzezi R, Ivry RB (2018) Invariant errors reveal limitations in  
838 motor correction rather than constraints on error sensitivity. *Commun Biol* 1:19.
- 839 Kim HE. 2019. Influence-of-task-outcome-on-implicit-motor-learning. Github.  
840 <https://github.com/hyosubkim/Influence-of-task-outcome-on-implicit-motor-learning>. 0583d26.  
841
- 842 Knill DC, Bondada A, Chhabra M (2011) Flexible, Task-Dependent Use of Sensory Feedback to  
843 Control Hand Movements. *J Neurosci* 31:1219–1237.
- 844 Körding KP, Wolpert DM (2004) Bayesian integration in sensorimotor learning. *Nature* 427:244–247.
- 845 Krakauer JW, Ghez C, Ghilardi MF (2005) Adaptation to Visuomotor Transformations: Consolidation,  
846 Interference, and Forgetting. *J Neurosci* 25:473–478.
- 847 Lakens D (2013) Calculating and reporting effect sizes to facilitate cumulative science: a practical  
848 primer for t-tests and ANOVAs. *Front Psychol* 4 Available at:  
849 <https://www.frontiersin.org/articles/10.3389/fpsyg.2013.00863/full> [Accessed June 29, 2018].
- 850 Leow L-A, Marinovic W, de Rugy A, Carroll TJ (2018) Task errors contribute to implicit aftereffects in  
851 sensorimotor adaptation. *Eur J Neurosci* Available at: <http://doi.wiley.com/10.1111/ejn.14213>  
852 [Accessed November 24, 2018].

- 853 Magescas F, Prablanc C (2006) Automatic Drive of Limb Motor Plasticity. *J Cogn Neurosci* 18:75–83.
- 854 Manohar SG, Finzi RD, Drew D, Husain M (2017) Distinct Motivational Effects of Contingent and  
855 Noncontingent Rewards. *Psychol Sci* 28:1016–1026.
- 856 Mazzoni P, Krakauer JW (2006) An implicit plan overrides an explicit strategy during visuomotor  
857 adaptation. *J Neurosci* 26:3642–3645.
- 858 McDougle SD, Bond KM, Taylor JA (2015) Explicit and Implicit Processes Constitute the Fast and Slow  
859 Processes of Sensorimotor Learning. *J Neurosci* 35:9568–9579.
- 860 McDougle SD, Ivry RB, Taylor JA (2016) Taking Aim at the Cognitive Side of Learning in Sensorimotor  
861 Adaptation Tasks. *Trends Cogn Sci* 20:535–544.
- 862 Morehead JR, Taylor JA, Parvin DE, Ivry RB (2017) Characteristics of Implicit Sensorimotor Adaptation  
863 Revealed by Task-irrelevant Clamped Feedback. *J Cogn Neurosci* 29:1061–1074.
- 864 Nikooyan AA, Ahmed AA (2015) Reward feedback accelerates motor learning. :633–646.
- 865 Ohmae S, Medina JF (2015) Climbing fibers encode a temporal-difference prediction error during  
866 cerebellar learning in mice. *Nat Neurosci* 18:1798–1803.
- 867 Pelli DG (1997) The VideoToolbox software for visual psychophysics: transforming numbers into  
868 movies. *Spat Vis* 10:437–442.
- 869 Reichenthal M, Avraham G, Karniel A, Shmuelof L (2016) Target size matters: target errors contribute  
870 to the generalization of implicit visuomotor learning. *J Neurophysiol* 116:411–424.
- 871 Schlerf J, Ivry RB, Diedrichsen J (2012) Encoding of Sensory Prediction Errors in the Human  
872 Cerebellum. *J Neurosci* 32:4913–4922.
- 873 Schmitz G, Bock O, Grigorova V, Ilieva M (2010) Adaptation of eye and hand movements to target  
874 displacements of different size. *Exp Brain Res* 203:479–484.
- 875 Shadmehr R, Smith MA, Krakauer JW (2010) Error correction, sensory prediction, and adaptation in  
876 motor control. *Annu Rev Neurosci* 33:89–108.
- 877 Shmuelof L, Huang VS, Haith AM, Delnicki RJ, Mazzoni P, Krakauer JW (2012) Overcoming Motor  
878 “Forgetting” Through Reinforcement Of Learned Actions. *J Neurosci* 32:14617-14621a.
- 879 Smith MA, Ghazizadeh A, Shadmehr R (2006) Interacting Adaptive Processes with Different  
880 Timescales Underlie Short-Term Motor Learning. *PLOS Biol* 4:e179.
- 881 Soechting JF (1984) Effect of target size on spatial and temporal characteristics of a pointing  
882 movement in man. *Exp Brain Res* 54:121–132.
- 883 Summerside E, Shadmehr R, Ahmed AA (2018) Vigor of reaching movements: reward discounts the  
884 cost of effort. *J Neurophysiol* Available at:  
885 <https://www.physiology.org/doi/abs/10.1152/jn.00872.2017> [Accessed March 16, 2018].
- 886 Tanaka H, Krakauer JW, Sejnowski TJ (2012) Generalization and Multirate Models of Motor  
887 Adaptation. *Neural Comput* 24:939–966.

- 888 Taylor JA, Hieber LL, Ivry RB (2013) Feedback-dependent generalization. *J Neurophysiol* 109:202–  
889 215.
- 890 Taylor JA, Ivry RB (2011) Flexible Cognitive Strategies during Motor Learning Diedrichsen J, ed. *PLoS*  
891 *Comput Biol* 7:e1001096.
- 892 Taylor JA, Klempfuss NM, Ivry RB (2010) An explicit strategy prevails when the cerebellum fails to  
893 compute movement errors. *Cerebellum* 9:580–586.
- 894 Taylor JA, Krakauer JW, Ivry RB (2014) Explicit and Implicit Contributions to Learning in a  
895 Sensorimotor Adaptation Task. *J Neurosci* 34:3023–3032.
- 896 Therrien AS, Wolpert DM, Bastian AJ (2016) Effective reinforcement learning following cerebellar  
897 damage requires a balance between exploration and motor noise. *Brain* 139:101–114.
- 898 Therrien AS, Wolpert DM, Bastian AJ (2018) Increasing Motor Noise Impairs Reinforcement Learning in  
899 Healthy Individuals. *eneuro*:ENEURO.0050-18.2018.
- 900 Thoroughman KA, Shadmehr R (2000) Learning of action through adaptive combination of motor  
901 primitives. *Nature* 407:742–747.
- 902 Tseng YW, Diedrichsen J, Krakauer JW, Shadmehr R, Bastian AJ (2007) Sensory prediction errors  
903 drive cerebellum-dependent adaptation of reaching. *J Neurophysiol* 98:54–62.
- 904 Vandevorode K, Orban de Xivry J-J (2018) Motor adaptation but not internal model recalibration  
905 declines with aging. *bioRxiv* Available at: <http://biorxiv.org/lookup/doi/10.1101/292250>  
906 [Accessed June 12, 2018].
- 907 Vaswani PA, Shmuelof L, Haith AM, Delnicki RJ, Huang VS, Mazzoni P, Shadmehr R, Krakauer JW  
908 (2015) Persistent Residual Errors in Motor Adaptation Tasks: Reversion to Baseline and  
909 Exploratory Escape. *J Neurosci* 35:6969–6977.
- 910 Wagner MJ, Kim TH, Savall J, Schnitzer MJ, Luo L (2017) Cerebellar granule cells encode the  
911 expectation of reward. *Nature* Available at:  
912 <http://www.nature.com/doi/10.1038/nature21726> [Accessed April 2, 2017].
- 913 Wu HG, Miyamoto YR, Castro LNG, Ölveczky BP, Smith MA (2014) Temporal Structure of Motor  
914 Variability is Dynamically Regulated and Predicts Motor Learning Ability. *Nat Neurosci* 17:312–  
915 321.
- 916  
917  
918  
919  
920



921 **METHODS**

922 *Participants:* Healthy, young adults (N=116, 69 females; average age = 20.9 years old, range: 18.2 –  
923 27.8) were recruited from the University of California, Berkeley, community. Each participant was tested  
924 in only one experiment and was right-handed, as verified with the Edinburgh Handedness Inventory  
925 (Oldfield, 1971). All participants provided written informed consent to participate in the study and to  
926 allow publication of their data, and received financial compensation for their participation. The  
927 Institutional Review Board at UC Berkeley approved all experimental procedures under ID number  
928 2016-02-8439.

929

930 *Experimental Apparatus:* The participant was seated at a custom-made tabletop housing an LCD  
931 screen (53.2 cm by 30 cm, ASUS), mounted 27 cm above a digitizing tablet (49.3 cm by 32.7 cm,  
932 Intuos 4XL; Wacom, Vancouver, WA). The participant made reaching movements by sliding a modified  
933 air hockey "paddle" containing an embedded stylus. The position of the stylus was recorded by the  
934 tablet at 200 Hz. The experimental software was custom written in Matlab, using the Psychtoolbox  
935 extensions (Pelli, 1997).

936

937 *Reaching Task:* Center-out planar reaching movements were performed from the center of the  
938 workspace to targets positioned at a radial distance of 8 cm. Direct vision of the hand was occluded by  
939 the monitor, and the lights were extinguished in the room to minimize peripheral vision of the arm. The  
940 starting and target locations were indicated by white and blue circles, respectively (start circle: 6 mm in  
941 diameter; target: either 6, 9.8 or 16 mm depending on condition).

942

943 To initiate each trial, the participant moved the digitizing stylus into the start location. The position of the  
944 stylus was indicated by a white feedback cursor (3.5 mm diameter). Once the start location was  
945 maintained for 500 ms, the target appeared. For Experiments 1 and 3, the target could appear at one of  
946 8 locations, placed in 45° increments around a virtual circle (0°, 45°, 95°, 135°, 180°, 225°, 270°, 315°).

947 For Experiment 2, the target could appear at one of four locations placed in 90° increments around a  
948 virtual circle (45°, 135°, 225°, 315°). We reduced the number of targets from 8 to 4 in Experiment 2 in  
949 order to increase the overall number of training cycles with the clamp to ensure that participants reach  
950 a stable asymptote, while keeping the experiment under 1.5 hours. Participants were instructed to  
951 accurately and rapidly "slice" through the target, without needing to stop at the target location. Visual  
952 feedback, when presented, was provided during the reach until the movement amplitude exceeded 8  
953 cm. As described below, the feedback either matched the position of the stylus (veridical) or followed a  
954 fixed path (clamped). If the movement duration (excluding RT) was not completed within 300 ms, the  
955 words "too slow" were generated by the sound system of the computer.

956

957 After the hand crossed the target ring, endpoint cursor feedback was provided for 50 ms either at the  
958 position in which the hand crossed the virtual target ring (veridical feedback) or at a fixed distance  
959 determined by the size of the clamp. During the return movement, the feedback cursor reappeared  
960 when the participant's hand was within 1 cm of the start position.

961

962 *Experimental Feedback Conditions:* Across the experimental session, there were three types of visual  
963 feedback. On no-feedback trials, the cursor disappeared when the participant's hand left the start circle  
964 and only reappeared at the end of the return movement. On veridical feedback trials, the cursor  
965 matched the position of the stylus during the 8 cm outbound segment of the reach. On clamped  
966 feedback trials, the feedback followed a path that was fixed along a specific hand angle. The radial  
967 distance of the cursor from the start location was still based on the radial extent of the participant's  
968 hand during the 8 cm outbound segment, but the angular position was fixed relative to the target (i.e.,  
969 independent of the angular position of the hand).

970

971 The primary instructions to the participant (experiment script included) remained the same across the  
972 experimental session: Specifically, that they were to reach directly towards the visual target. Prior to the  
973 introduction of the clamped feedback trials, participants were briefed about the feedback manipulation.  
974 They were informed that the position of the cursor would now follow a fixed trajectory and that the  
975 angular position would be independent of their movement. They were explicitly instructed to ignore the  
976 cursor and continue to reach directly to the target. Participants also performed three instructed trials  
977 with the clamp perturbation on. During these practice trials, a target appeared at the 90° location  
978 (straight ahead), and the experimenter instructed the participant to first “reach straight to the left” (ie,  
979 180°). For the second practice trial, the participant was instructed to “reach straight to the right” (0°).  
980 For the last trial, the participant was instructed to “reach straight down (towards your torso)” (ie, 270°).  
981 The purpose of these trials was to familiarize the participant with the exact clamp condition they were  
982 about to experience. Following these three practice trials, the experimenter confirmed with the  
983 participant they understood now what was meant by clamped visual feedback. These practice trials  
984 were removed from future analyses.

985

986 The same instructions in abbreviated form (“Ignore the cursor and move your hand directly to the target  
987 location”) were repeated verbally and with onscreen text at every block break during the clamp  
988 perturbation. Participants were debriefed at the end of the experiment and asked whether they ever  
989 intentionally tried to reach to locations other than the target. All subjects reported aiming to the target  
990 throughout the experiment.

991

992 We counterbalanced clockwise and counterclockwise clamps within each group for all three  
993 experiments.

994

995 *Experiment 1*

996 Participants (n=48, 16/group) were randomly assigned to one of three groups, each training with a 3.5°  
997 clamp but differing only in terms of the size of the target: 6mm, 9.8, or 16 mm diameter. These sizes  
998 were chosen so that at an 8 cm radial distance the clamped cursor would be adjacent to the target  
999 without making any contact (Target Miss group), straddling the target by being roughly half inside and  
1000 half outside the target (Straddle Target group), or fully embedded within the target (Hit Target group).  
1001 The Euclidean distance for this clamp size, measured from the centers of cursor and target, was 4.9  
1002 mm.

1003

1004 The session began with two baseline blocks, the first comprised of 5 movement cycles (40 total  
1005 reaches to 8 targets) without visual feedback and the second comprised of 10 cycles with a veridical  
1006 cursor displaying hand position. The experimenter then informed the participant that the visual  
1007 feedback would no longer be veridical and would now be clamped at a fixed angle from the target  
1008 location. Immediately following these general instructions, the experimenter continued providing  
1009 instructions for the three practice trials which immediately followed (see Experimental Feedback  
1010 Conditions). After the practice trials and confirming the participant's understanding of the task, the  
1011 clamp block ensued for a total of 80 cycles. A short break (<1 min), as well as a reminder of the task  
1012 instructions, was provided after 40 cycles (i.e., at the halfway point of this block). Immediately following  
1013 the perturbation block, there were two washout blocks, first a 5 cycle block in which there was no visual  
1014 feedback, followed by 10 cycles with veridical visual feedback. These blocks were preceded by  
1015 instructions regarding the change in experimental condition and participants were reminded to always  
1016 aim for the target and to attempt to slice through it with their hand.

1017

## 1018 *Experiment 2*

1019 In Experiment 2 we assessed adaptation over an extended number of clamped visual feedback trials.  
1020 The purpose of extending the perturbation block was to ensure that participants reached asymptotic

1021 levels of learning. In order to achieve a greater number of training cycles, we reduced the number of  
1022 target locations within the set from 8 to 4.

1023

1024 Participants (n=32, 16/group) trained with a 1.75° clamp (2.4 mm distance between target and cursor  
1025 centers) and were assigned to either a small (Straddle) or large (Hit) target condition. The session  
1026 started with two baseline blocks, 10 cycles (40 reaches) without visual feedback and then 10 cycles  
1027 with veridical feedback. Following 3 practice trials with the clamp, the number of cycles in the clamped  
1028 visual feedback block was nearly tripled from that of Experiment 1 to 220 cycles, with breaks provided  
1029 after every 70 cycles. Following 220 cycles of training with a 1.75° clamp, there were two washout  
1030 blocks, first a 10 cycle block in which there was a 0° clamp, followed by 10 cycles with veridical visual  
1031 feedback. Prior to washout, participants were again instructed to always aim directly to the target.

1032

### 1033 *Experiment 3*

1034 Experiment 3 used a transfer design to evaluate different hypotheses concerning the role of task  
1035 outcome on implicit sensorimotor learning. Our main predictions focused on the transfer phase,  
1036 comparing the participants' behavior to the predictions of three models (see section, *Theoretical*  
1037 *analysis of the effect of task outcome on implicit learning*). We tested two main groups (n=12/group) in  
1038 Experiment 3, using a 1.75° clamp in both the acquisition and transfer phases. The session started with  
1039 two baseline blocks, 5 cycles (40 reaches) without visual feedback and then 5 cycles with veridical  
1040 feedback. After the baseline blocks, clamp instructions and three practice trials were provided to all  
1041 participants. The first clamp block (acquisition phase) lasted 120 cycles, with participants training with  
1042 either a small or large target. Following the first 120 cycles, the target sizes were reversed for the next  
1043 80 cycles (transfer phase: Straddle-to-Hit or Hit-to-Straddle conditions). Breaks of < 1 min were  
1044 provided after every 35 cycles of training. On the break preceding the transfer (15 cycles before target  
1045 switch), participants were told that everything would continue on as before, except that the target size  
1046 would change at some point during the block. The purpose of staggering the break with the transfer

1047 was to mitigate any change in adaptation due to temporal decay that could result from a break in  
1048 training (Hadjiosif and Smith, 2013).

1049

1050 *Control group*

1051 A third group (n=12) was added to test whether the attenuation of adaptation in the large target  
1052 condition was due to perceptual uncertainty. Here, the block structure was identical to the first two  
1053 groups. We used a modified large target (16mm), one which had a bright green bisecting line through  
1054 the middle, aligned with the target direction. The clamped cursor always fell within one half of the target  
1055 (either clockwise or counter-clockwise depending on the condition), thus providing a clear indication  
1056 that the cursor was off center. At the transfer, the bisecting line was removed and participants trained  
1057 for 80 cycles with the standard large target.

1058

1059 *Data Analysis*

1060 All statistical analyses and modeling were performed using Matlab 2015b and the Statistics Toolbox.  
1061 Data and code are available on GitHub at: [https://github.com/hyosubkim/Influence-of-task-outcome-on-](https://github.com/hyosubkim/Influence-of-task-outcome-on-implicit-motor-learning)  
1062 [implicit-motor-learning](https://github.com/hyosubkim/Influence-of-task-outcome-on-implicit-motor-learning) (Kim, 2019). The primary dependent variable in all experiments was hand angle  
1063 at peak radial velocity, defined by the angle of the hand relative to the target at the time of peak radial  
1064 velocity (i.e., angle between lines connecting start position to target and start position to hand).  
1065 Throughout the text, we refer to this variable as hand angle. Additional analyses were performed using  
1066 hand angle at “endpoint” (angle of the hand as it crossed the invisible target ring) rather than peak  
1067 radial velocity. The results were essentially identical for the two dependent variables; as such, we only  
1068 report the results of the analyses using peak radial velocity.

1069

1070 Data used in statistical analyses were tested for normality and homogeneity of variance using Shapiro-  
1071 Wilks and Levene’s tests, respectively. When normality or homogeneity of variance was violated, we  
1072 performed non-parametric permutation tests in addition to standard parametric tests (i.e., t-tests and

1073 ANOVAs) and report results from both. For comparisons between two groups, we used the difference  
1074 between group means as our test statistic. This value was compared to a null distribution, created by  
1075 random shuffling of group assignment in 10,000 Monte Carlo simulations (resampling with  
1076 replacement), to obtain an exact p-value. When a comparison involved more than two groups, we used  
1077 a similar approach, but used the F-value obtained from a one-way ANOVA as our test statistic.

1078

1079 Outlier responses were removed from the analyses. For the sole purpose of identifying outliers, the  
1080 Matlab “smooth” function was used to calculate a moving average (using a 5-trial window) of the hand  
1081 angle data for each target location. Outliers were trials in which the observed hand angle was greater  
1082 than 90° or deviated by more than 3 standard deviations from the moving average. In total, less than  
1083 0.8% of trials overall were removed, and the most trials removed for any individual across all three  
1084 experiments was 2%.

1085

1086 Individual baseline biases for each target location were subtracted from all data. Biases were defined  
1087 as the average hand angles across cycles 2-10 (Experiments 1 and 2) or 2-5 (Experiment 3) of the  
1088 feedback baseline block. These same cycles were used to calculate mean baseline RTs, MTs, and  
1089 movement variability (SD). To calculate each participant’s baseline RT or MT, we took the average of  
1090 median values at each target location. To calculate each participant’s movement variability, we took the  
1091 average of the standard deviations of hand angles at each target location.

1092

1093 In order to pool all of the data and to aid visualization, we flipped the hand angles for all participants  
1094 clamped in the counterclockwise direction.

1095

1096 For Experiments 1 and 3, movement cycles consisted of 8 consecutive reaches (1 reach/target); for  
1097 Experiment 2, we only used four targets, thus a movement cycle consisted of 4 consecutive reaches (1  
1098 reach/target). To estimate the rate of early adaptation, we calculated the mean change in hand angle

1099 per cycle over the first five cycles. To provide a more stable estimate of hand angle at cycle 5, we  
1100 averaged over cycles 3-7 of the clamp block. We opted to use this measure of early adaptation rather  
1101 than obtain parameter estimates from exponential fits since the latter approach gives considerable  
1102 weight to the asymptotic phase of performance, and, therefore, would be less sensitive to early  
1103 differences in rate. This would be especially problematic in Experiment 2, which utilized 220 clamp  
1104 cycles. We also performed a secondary analysis of early adaptation rates using a larger window, cycles  
1105 2-11 (Krakauer et al., 2005). Results from using this alternate metric were consistent with the reported  
1106 analyses (i.e., slower rates for Hit Target groups), only they resulted in larger effect sizes due to the  
1107 gradually increasing divergence of learning functions. Asymptotic adaptation (i.e., late learning) was  
1108 defined as the average hand angle over the last 10 cycles within a clamp block. In Experiment 1, the  
1109 aftereffect was quantified by using the data from the first no-feedback cycle following the last clamp  
1110 cycle. This measure yielded similar statistical results as that based on the analysis of asymptotic  
1111 adaptation.

1112

1113 All t-tests were two-tailed. Posthoc pairwise comparisons following significant ANOVAs were performed  
1114 using two-tailed t-tests, with a corrected  $\alpha$  of .017 due to multiple comparisons. Cohen's d, eta squared  
1115 ( $\eta^2$ ), partial eta squared (for mixed model ANOVA), and  $d_z$  (for within-subjects design) values are  
1116 provided as standardized measures of effect size (Lakens, 2013). Values in main text are reported as  
1117 95% CIs in brackets and mean  $\pm$  SEM.

1118

1119 No statistical methods were used to predetermine sample sizes. The chosen sample sizes were based  
1120 on our previous studies using the clamp method (Morehead et al., 2017; Kim et al., 2018), as well as  
1121 prior psychophysical studies of human sensorimotor learning (Huang et al., 2011; Galea et al., 2015;  
1122 Vaswani et al., 2015; Gallivan et al., 2016).

1123

1124



1125

1126 *Modeling*

1127 For the Movement Reinforcement model, a population vector (Georgopoulos et al., 1986),  $V$ , indicates  
1128 the current bias of motor representations within the reinforcement system. The direction of this vector  
1129 ( $V_d$ ) was calculated for each trial in the following manner:

1130 
$$V_x(n) = \mathbf{r}(n) \cdot \mathbf{u}_x$$

1131 
$$V_y(n) = \mathbf{r}(n) \cdot \mathbf{u}_y$$

1132 
$$V_d(n) = \tan^{-1}(V_y(n) / V_x(n))$$

1133 Here,  $\mathbf{r}$  represents the weights on every unit (36,000 total units representing a resolution of  $.01^\circ$ );  $\mathbf{u}$  is a  
1134 vector filled with unit vectors pointing in all 36,000 directions; and  $x$  and  $y$  subscripts represent the  $x$ -  
1135 and  $y$ -components for both  $V$  and  $\mathbf{u}$ , respectively. The mean preferred direction,  $V_d$ , was converted  
1136 from radians into degrees. The strength of the biasing signal,  $V_i$ , is equal to the population vector

1137 length:  $\sqrt{V_x^2 + V_y^2}$ , with the constraint that  $0 \leq V_i \leq 1$ .

1138

1139 In order to calculate confidence intervals for the parameter estimates, we applied standard  
1140 bootstrapping techniques, constructing group-averaged hand angle data 1000 times by randomly  
1141 resampling with replacement from the pool of participants within each group. Using Matlab's *fmincon*  
1142 function, we started with ten different initial sets of parameter values and estimated the retention and  
1143 learning parameters that minimized the least squared error between the bootstrapped data and model  
1144 output ( $x_n$ ). Parameter estimates were bounded such that  $0 < A < 1$  and  $0 < U(e) < e$ , where  $e$  is equal  
1145 to the clamp size in degrees.

1146

1147 The hybrid models combined the Movement Reinforcement with either the Adaptation Modulation or  
1148 Dual Error model. Each hybrid incorporated the equations for the Movement Reinforcement model

1149 (Eqns. 2-4). However, when movement reinforcement was combined with the Adaptation Modulation  
1150 model, the contribution of the adaptation system,  $x$ , to the motor output,  $y$ , was derived from the gain  
1151 modulation equation (Eqn. 5). When movement reinforcement was combined with the Dual Error  
1152 model, equations 6-8 were used, with  $x_{total}$  now substituting for  $x$  in Eqn. 2.

1153 **SUPPLEMENTAL INFORMATION**

1154 *Experiment 3: Kinematic variables*

1155 Baseline movement variability was not different across all three groups, including the control group  
 1156 trained with the bisected target ( $F(2,33)=1.38$ ,  $p=.267$ ,  $\eta^2=.077$ ). Similarly, no differences across groups  
 1157 were observed for either RTs ( $F(2,33)=1.51$ ,  $p=.236$ ,  $\eta^2=.0084$ ) or MTs ( $F(2,33)=.46$ ,  $p=.634$ ,  $\eta^2=.027$ ).

1158  
 1159  
 1160 **Table 2: Average Reaction Times (RTs).** Values represent mean  $\pm$  SEM.

| <b>Experiment 1</b> | <b>Baseline</b> | <b>Early clamp</b> | <b>Late clamp</b> | <b>No feedback</b> |
|---------------------|-----------------|--------------------|-------------------|--------------------|
| Hit                 | 325 $\pm$ 7     | 327 $\pm$ 7        | 347 $\pm$ 11      | 344 $\pm$ 12       |
| Straddle            | 362 $\pm$ 12    | 359 $\pm$ 14       | 397 $\pm$ 32      | 407 $\pm$ 33       |
| Miss                | 386 $\pm$ 22    | 383 $\pm$ 19       | 378 $\pm$ 15      | 385 $\pm$ 15       |
| <b>Experiment 2</b> |                 |                    |                   | <b>0° clamp</b>    |
| Hit                 | 378 $\pm$ 22    | 376 $\pm$ 27       | 354 $\pm$ 9       | 351 $\pm$ 9        |
| Straddle            | 373 $\pm$ 12    | 366 $\pm$ 13       | 368 $\pm$ 15      | 373 $\pm$ 16       |
| <b>Experiment 3</b> |                 |                    |                   |                    |
| Hit-to-Straddle     | 356 $\pm$ 19    | 350 $\pm$ 15       | 326 $\pm$ 9       | N/A                |
| Straddle-to-Hit     | 360 $\pm$ 8     | 360 $\pm$ 7        | 355 $\pm$ 7       | N/A                |
| Bisected-to-Normal  | 400 $\pm$ 28    | 395 $\pm$ 27       | 400 $\pm$ 25      | N/A                |

1161  
 1162  
 1163 **Table 3: Average Movement Times (MTs).** Values represent mean  $\pm$  SEM.

| <b>Experiment 1</b> | <b>Baseline</b> | <b>Early clamp</b> | <b>Late clamp</b> | <b>No feedback</b> |
|---------------------|-----------------|--------------------|-------------------|--------------------|
| Hit                 | 153 $\pm$ 11    | 150 $\pm$ 10       | 137 $\pm$ 8       | 133 $\pm$ 9        |
| Straddle            | 162 $\pm$ 8     | 149 $\pm$ 8        | 139 $\pm$ 7       | 131 $\pm$ 7        |
| Miss                | 137 $\pm$ 7     | 134 $\pm$ 7        | 124 $\pm$ 6       | 118 $\pm$ 6        |
| <b>Experiment 2</b> |                 |                    |                   | <b>0° clamp</b>    |
| Hit                 | 149 $\pm$ 8     | 159 $\pm$ 20       | 155 $\pm$ 11      | 127 $\pm$ 7        |
| Straddle            | 157 $\pm$ 8     | 161 $\pm$ 15       | 170 $\pm$ 18      | 130 $\pm$ 8        |
| <b>Experiment3</b>  |                 |                    |                   |                    |
| Hit-to-Straddle     | 158 $\pm$ 7     | 189 $\pm$ 12       | 168 $\pm$ 12      | N/A                |
| Straddle-to-Hit     | 164 $\pm$ 11    | 207 $\pm$ 28       | 169 $\pm$ 13      | N/A                |
| Bisected-to-Normal  | 151 $\pm$ 11    | 165 $\pm$ 14       | 166 $\pm$ 15      | N/A                |

1164  
 1165  
 1166  
 1167  
 1168  
 1169  
 1170  
 1171

1172 **Table 4: Movement variability during baseline block.** Values represent mean  $\pm$  SEM.

| <b>Experiment 1</b> | <b>Baseline SD</b> |
|---------------------|--------------------|
| Hit                 | 4.19 $\pm$ .26°    |
| Straddle            | 3.61 $\pm$ .16°    |
| Miss                | 3.80 $\pm$ .15°    |
| <b>Experiment 2</b> |                    |
| Hit                 | 3.09 $\pm$ .18°    |
| Straddle            | 3.57 $\pm$ .16°    |
| <b>Experiment 3</b> |                    |
| Hit-to-Straddle     | 3.30 $\pm$ .22°    |
| Straddle-to-Hit     | 3.85 $\pm$ .37°    |
| Bisected-to-Normal  | 3.97 $\pm$ .31°    |

1173  
1174  
1175  
1176  
1177  
1178

1179

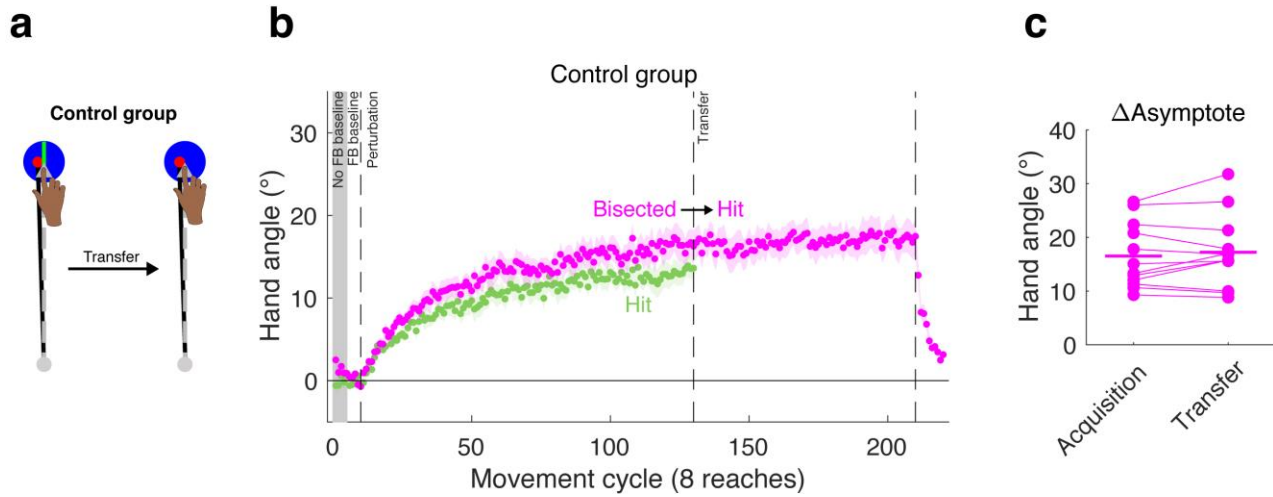

1180

1181

1182

1183

1184

1185

1186

1187

1188

1189

1190

**Figure 5-figure supplement 1 Control group from Experiment 3. (a)** Using a transfer design, **(b)** the behavior of the control group reaching to a large target bisected by a line (aligned with the target direction) during the acquisition phase is shown in magenta. The change in hand angle was not significantly different than that observed for the group that was tested with the large target in the acquisition phase of Experiment 3 (re-plotted here in green), suggesting that perceptual uncertainty did not make a substantive contribution to the effects of hitting the target. We omitted the transfer behavior of the large target group as this was when the large target was replaced with the small target. **(c)** There was no change in asymptote when going from the bisected target to the standard large target.

1191

## Target Size Experiment Instructions

### Pre-Experiment Instructions (verbal):

- “The point of this experiment is to better understand how the brain controls reaching movements. We are especially interested in how motor control is impacted by various neurological disorders, like Parkinson’s disease and cerebellar degeneration. As a healthy student, your data will be used as a normative baseline for future comparisons with these neurological patients. The information we gain from this experiment could help improve rehabilitation for these patients, so please try your best to pay attention and follow all instructions.”
- “You will be holding this ‘pen’ at the red base and should maintain the same grip throughout the experiment. (Demonstrate how to hold pen) You will be making fast center-out reaching movements towards a blue target that will appear in one of several different locations.” (Physically demonstrate the reaching movements)
- “Try your best to reach quickly and accurately in a straight line, and try to slice through the blue targets rather than stopping at the target. So, slice and come back to the home position.”
- “These are center-out reaches, which means that every trial starts from the exact same home location.”
- “During the experiment, you will see three different scenarios: you either won’t be able to see the cursor, your cursor will reflect your hand position, or you won’t be controlling the cursor at all. Regardless of what phase of the experiment you are in, your goal should always be to bring your hand directly to the blue target. And, of course, I will always tell you ahead of time which condition you are in.”
- “You will go through several different blocks of trials, some lasting longer than others, but there will be several breaks at different points of the experiment.”
- “I will give you time to adjust the seat height and scoot in close to the work station; you will be making many reaches towards the end of the tablet, and I want you to be able to do that without moving any parts of your body other than your arm.” (demonstrate)
- “Try to keep the same posture throughout the experiment.”
- “Rest your left hand in your lap.”
- “I will talk you through the first several trials.”
- “Do you have any questions?” (Run game code and switch seats.)
- “I’ll give you a minute to get comfortable before turning out the lights.”

*\*\*Start program, move mouse and keypad*

*\*\*Participant gets situated before turn off the light*

*\*\*Turn off lights and close door*

### No feedback baseline block:

“In the center of the screen you can see a white circle that indicates the start position for each trial. When your hand is close to the start position, a cursor will appear indicating your actual hand position. For this first block of trials you won’t get to see the cursor when you reach to the target, but remember to still move your hand quickly to the target.”

(Explain “too slow” message after it happens. Remind them to make slicing movements.)

1240 (After several trials): “That knocking sound you hear means it was a valid trial and that you moved far  
1241 enough and fast enough. It does not mean you hit the target. There is no special sound for hitting the  
1242 target.”

1243  
1244 **Veridical feedback: After first pause (screen: “Good job!”)**

1245 “Great! The only difference for the next block of trials is that now you can see your cursor as you move  
1246 to the target. Continue to move your hand directly towards the target.”

1247  
1248 *Hit space bar.*

1249  
1250 **Error clamp block:**

1251  
1252 **Practice trials**

1253 **(screen: “You will now get to familiarize yourself with the next condition.”)**

- 1254 • “Great! During the next long block of trials you will continue to see the cursor, but its movement  
1255 direction will **not** be under your control. We will want you to ignore the cursor as you **continue**  
1256 **to focus on slicing through the targets with your hand.**”
- 1257 • “Before we start the next block, though, we’ll do three practice trials, just so that you will be  
1258 familiar with exactly what will happen in the next part of the experiment.”
- 1259 • “As a demonstration of what we mean by the cursor not being under your control, in the very  
1260 next trial, after the blue target appears, move your hand quickly to the left.” (*hit space bar*)
- 1261 • “Did you see how the cursor moved when you did, but it followed a fixed path independent of  
1262 where your hand moved?”
- 1263 • “I want you to now move quickly to the right after you find home and the target appears.” (*hit*  
1264 *space bar*)
- 1265 • “For the last practice trial, move in the opposite direction of the target.”

1266  
1267 **Perturbation**

1268 **(screen: “Ignore the cursor and move your hand directly to the target location.”)**

- 1269 • “Is it clear now that the cursor’s direction will not be under your control?”
- 1270 • “Those practice trials were so that you could see and experience what’s going to happen in the  
1271 next block. The cursor will move like that towards all the targets now. You’ll be controlling the  
1272 distance the cursor travels, but not its direction. We want to see how well you can reach to the  
1273 target while ignoring the cursor.”
- 1274 • “Your job is again to always reach directly for the target. But, remember, for the next block of  
1275 trials you do not have control over the cursor’s direction, so try to ignore the cursor and always  
1276 aim directly for the targets.”
- 1277 • “Is this clear?”

1278  
1279 After first couple of trials “Remember that you are controlling how far that cursor moves, but not its  
1280 direction, even though it may look like it. No matter where you move your hand, the cursor will still  
1281 travel along the same path relative to the target. Continue to ignore the cursor and move your hand  
1282 directly to the target.”

1283  
1284 *If slow, and trying to gauge cursor direction: “Please make quick, straight reaches to the target.”*

1285  
1286 **Short break – occurs after X trials (screen: “Ignore the cursor and move your hand directly to**  
1287 **the target location.”)**

1288  
1289  
1290  
1291  
1292  
1293  
1294  
1295  
1296  
1297  
1298  
1299  
1300  
1301  
1302  
1303

- “Feel free to take a quick break if you’d like, but please return back to the same grip and posture when you’re ready. If you’re okay, we can just keep going. Like before, you still won’t be controlling the cursor, but we still want you to move your hand directly to the blue target.”

**No feedback washout:**

- “Great. Keep bringing your hand directly to the target. The only change is you won’t see the cursor.”

**Veridical feedback washout:**

- “Nice job. You are back in control of the cursor now. Keep bringing your hand to the target. Remember to make quick, straight reaches. Once you begin your reach, follow through with it.” (You are making sure they are not trying to make online feedback corrections)
